1     **Amyloid- $\beta$  induced membrane damage instigates tunneling nanotubes by exploiting**  
2                                   **p21-activated kinase dependent actin remodulation**

3

4     **Aysha Dilna<sup>1+</sup>, Deepak K.V<sup>1+</sup>, Nandini Damodaran<sup>1+</sup>, Claudia S. Kielkopf<sup>2,3</sup>, Katarina**  
5                                   **Kagedal<sup>2</sup>, Karin Ollinger<sup>2</sup> and Sangeeta Nath<sup>1\*</sup>**

6

7             <sup>1</sup> Manipal Institute of Regenerative Medicine, Manipal Academy of Higher Education,  
8             Bangalore, 560065, India.

9             <sup>2</sup> Experimental Pathology, Department of Biomedical and Clinical Sciences Linköping  
10            University, 581 85 Linköping, Sweden.

11            <sup>3</sup> Current address: Novo Nordisk Foundation Center for Protein Research, University  
12            of Copenhagen, Copenhagen, Denmark.

13

14            <sup>+</sup> Equally contributed

15     \* **Corresponding to be addressed to** Sangeeta Nath, email: [sangeeta.nath@manipal.edu](mailto:sangeeta.nath@manipal.edu)

16

17     **Running Title:** Cell-to-cell transfer of oA $\beta$  in TNT

18

19     **Key words:** Alzheimer's disease, Tunneling nanotubes, amyloid- $\beta$ , lysosomal-exocytosis,  
20     clathrin independent endocytosis, p21-activated kinase, prion-like propagation.

21

22

23

24

25

26 **Abstract:** Alzheimer's disease (AD) pathology progresses gradually via anatomically  
27 connected brain regions. Earlier studies have shown that amyloid- $\beta_{1-42}$  oligomers (oA $\beta$ ) can be  
28 directly transferred between connected neurons. However, the mechanism of transfer is not  
29 fully revealed. We observed formation of oA $\beta$  induced tunneling nanotubes (TNTs),  
30 nanoscaled f-actin containing membrane conduit, in differentially differentiated SH-SY5Y  
31 neuronal models. Time-lapse images showed that TNTs propagate oligomers from one cell to  
32 another. Preceding the TNT-formation, we detected oA $\beta$  induced plasma membrane (PM)  
33 damage and calcium-dependent repair through lysosomal-exocytosis and significant membrane  
34 surface expansion, followed by massive endocytosis to re-establish the PM. Massive  
35 endocytosis was monitored by an influx of the membrane-impermeable dye TMA-DPH and  
36 PM damage was quantified by propidium iodide influx in the absence of calcium. The massive  
37 endocytosis eventually caused accumulation of internalized oA $\beta$  in Lamp1 positive multi  
38 vesicular bodies/lysosomes via the actin cytoskeleton remodeling p21-activated kinase1  
39 (PAK1) dependent endocytic pathway. Three dimensional quantitative and qualitative confocal  
40 imaging, structured illumination superresolution microscopy (SIM) and flowcytometry data  
41 revealed that oA $\beta$  induces activated phospho-PAK1, which modulates the formation of long  
42 stretched f-actin extensions between cells. Moreover, formation of TNTs can be inhibited by  
43 preventing PAK1 dependent internalization of oA $\beta$  using small-molecule inhibitor IPA-3, a  
44 highly selective cell permeable auto-regulatory inhibitor of PAK1. The present study gives  
45 insight that the TNTs are probably instigated as a consequence of oA $\beta$  induced PM damage  
46 and repair process, followed by PAK1 dependent endocytosis and actin remodeling, probably  
47 to maintain cell surface expansion and/or membrane tension in equilibrium.

48

49

50

51 **Introduction.**

52 Neurodegenerative diseases are propagating disorders characterized by accumulation of  
53 misfolded proteins that form aggregates, plaque and eventually cause neurodegeneration. A  
54 common hallmark of neurodegenerative diseases is prion-like self-propagation and gradual  
55 pathology progression in a predetermined pattern to different parts of the brain <sup>1</sup>. Several  
56 studies have shown that proteins involved in these diseases such as tau, A $\beta$ ,  $\alpha$ -synuclein  
57 and huntingtin follow common patterns including misfolding, self-propagation and neuron-to-  
58 neuron transfer <sup>2,3</sup>. In a model of Alzheimer's disease (AD), we have previously shown that  
59 spreading of AD pathology is due to direct transfer of amyloidogenic oligomers between  
60 connected neurons <sup>4</sup>. Moreover, lysosomal stress due to gradual accumulation of toxic non-  
61 degradable oA $\beta$  enhances the cell-to-cell progression of pathology <sup>5</sup>. The studies <sup>4,5</sup> have  
62 provided a possible explanations of how intracellular soluble oA $\beta$ , reported as the potential  
63 initiator or driver of AD <sup>6,7</sup>, could develop gradual pathology by propagating between  
64 connected cells. However, the mechanism of direct neuron-to-neuron propagation of  
65 neurodegenerative aggregates is not yet revealed.

66 Recently, several studies have demonstrated TNTs to transfer neurodegenerative proteins, such  
67 as PrP<sup>Sc</sup>,  $\alpha$ -synuclein, A $\beta$ , tau, polyQ, from one cell-to-another <sup>8-11</sup>. Several of these studies  
68 implicated links between TNTs and the endo-lysosomal pathway in cell-to-cell spreading <sup>12</sup>. In  
69 addition, exosomes are investigated as means of cell-to-cell transfer of A $\beta$  <sup>13,14</sup>. However, these  
70 studies could not explain the anatomically connected strict spatiotemporal pathology  
71 progression of AD. On the other hand, cell-to-cell transfers of both extracellular and  
72 intracellular monomers and protofibrils of A $\beta$ <sub>1-42</sub> via tunneling nanotubes (TNTs) are  
73 demonstrated in primary cultures of neurons and astrocytes <sup>8</sup>. However, the molecular basis of  
74 TNTs formation remains underexplored.

75 TNTs are open-ended membrane nanostructures consisting of membrane actin protrusions

76 between neighbouring cells. Correlative cryo-electron microscopy has recently demonstrated  
77 that TNTs are formed by 2-11 individual TNTs and their diameters vary between 145 to 700  
78 nm<sup>15</sup>. TNTs are transient structures that can stay intact from minutes to hours. Membrane  
79 protrusions like filopodium precede TNT formation and inhibition of actin polymerization  
80 attenuates their formation<sup>16</sup>. TNT formation prevails in neuronal cells and primary neurons<sup>17</sup>.  
81 Successive studies also showed TNT formation in different cell types, such as immune cells,  
82 fibroblast, epithelial cells, astrocytes, and neurons, as well as their implication in the spreading  
83 of pathology in neurodegenerative diseases, HIV, herpes simplex virus (HSV) infections and  
84 in cancer<sup>18-20</sup>. A growing number of studies have revealed that vesicle transfer, recycling  
85 vesicles, lysosomes and molecules involved in membrane expansion play a role behind the  
86 formation of TNTs, the actin membrane protrusions<sup>12,21</sup>.

87 In this study, we show oA $\beta$  induced formation of TNTs and direct cell-to-cell propagation of  
88 oA $\beta$  between neighbouring cells via TNTs. Preceding the formation of TNTs, we detect oA $\beta$   
89 induced PM damage and repair through lysosomal exocytosis, which is followed by massive  
90 endocytosis via the membrane cytoskeleton actin remodulating kinase PAK1 engaged  
91 endocytic pathway. Endocytosis of oA $\beta$  activates phospho-PAK1, which modulates long  
92 stretched f-actin and formation of TNTs. Moreover, formation of TNTs can be prevented by  
93 inhibiting PAK1 dependent endocytosis and actin remodulation. Altogether, these observations  
94 give new insights that sprouting of TNTs might be instigated as a consequence of oA $\beta$  induced  
95 PM damage and Ca<sup>2+</sup> dependent PM repair through lysosomal exocytosis via PAK1 dependent  
96 actin remodelling.

97

98

99

100

101 **Material and Methods.**

102 **Preparation of soluble oA $\beta$ .** Freshly made unlabelled oA $\beta$  and fluorescently labelled oA $\beta$ -  
103 TMR were prepared from lyophilized A $\beta$  (A $\beta$ <sub>1-42</sub>) and A $\beta$ -TMR (A $\beta$ <sub>1-42</sub>-5-tetramethyl  
104 rhodamin) suspended in 1,1,1,3,3,3-hexafluoro-2-propanol (AnaSpec). Lyophilized A $\beta$  and  
105 A $\beta$ -TMR were resuspended at a concentration of 5 mM in Me<sub>2</sub>SO and then diluted to a  
106 concentration of 100  $\mu$ M in HEPES buffer, pH 7.4. The solution was immediately vortexed  
107 and sonicated for 2 min and then incubated at 4°C for 24 hours<sup>4,5</sup>. Oligomers were  
108 characterized before the experiments similarly as reported in our earlier papers<sup>4,5</sup>, by electron  
109 microscopy imaging using a Jeol 1230 transmission electron microscope equipped with an  
110 ORIUS SC 1000 CCD camera, together with SDS-PAGE, Native-PAGE western blots and size  
111 exclusion chromatography.

112

113 **Neuronal cells culture and differentiations.** SH-SY5Y neuronal cells (ECACC; Sigma-  
114 Aldrich) were seeded on 10-mm glass-bottom Petri dishes (MatTek) at a concentration of  
115 12,000 cells/cm<sup>2</sup>. Cells were partially differentiated with 10  $\mu$ M retinoic acid (RA; Sigma-  
116 Aldrich) for 7 days. Pre-differentiated or partially differentiated SH-SY5Y cells were further  
117 differentiated for additional 10 days in 10-mm glass-bottom Petri dishes (MatTek) with brain-  
118 derived neurotrophic factor, neuregulin-1, nerve growth factor, and vitamin D<sub>3</sub>. After 10 days  
119 of differentiation on glass, the cells form long, branched neurites and several neurospecific  
120 markers, as described previously<sup>4,22</sup>.

121

122 **Cell culture and transfections.**

123 For actin, PM, Lamp1 and GFP-GPI, plasmid constructs were used. The plasmid mEGFP-  
124 lifeact-7 (Addgene # 54610) was a gift from Michael Davidson and Lamp1-mGFP (Addgene  
125 # 34831) was a gift from Esteban Dell'Angelica<sup>23</sup>. CAAX-mCherry (Ampicillin resistant)

126 original source is <sup>24</sup> and GFP-GPI construct previously used by others <sup>25,26</sup>. The competent  
127 DH5 $\alpha$  strain *E.coli* cells were used to transform the bacterial cells to be used for isolation of  
128 the plasmids. Plasmid DNA isolation was carried out using the QIAGEN Plasmid Midi kit.  
129 Transfections of SH-SY5Y cells were done using jetPRIME transfection reagent (Polyplus)  
130 and also by using Lipofectamine 3000 (Invitrogen). The cells (30,000 per well) were seeded  
131 on glass coverslips placed in a 24 well plate in 0.5 mL culture media. The plasmid DNA (0.5  
132  $\mu$ g) was diluted in 50  $\mu$ L of jetPRIME buffer and vortexed for 10 seconds, followed by mixing  
133 with 1.6  $\mu$ L of jetPRIME reagent which was then added to the cells cultured at 70-90%  
134 confluency and incubated between 24-48 hours before taking images. The transfection using  
135 Lipofectamine 3000 (Invitrogen) were done using (0.5  $\mu$ g) plasmid-DNA complex added to  
136 the cells with fresh Opti-MEM (reduced serum) media which are at 70-90% confluency. The  
137 mixture was left for two to three hours and then removed. Fresh DMEM media with serum was  
138 added and microscopic images were taken after 24 - 48 hours.

139

140 **oA $\beta$  internalization/uptake.** To investigate the uptake mechanisms of oA $\beta$  in the used cell  
141 system, differentiated SH-SY5Y cells were pre-treated with inhibitors in growth medium for  
142 the indicated time and at the indicated concentration (Table 1). After washing with PBS, a final  
143 concentration of 0.5  $\mu$ M oligomerised A $\beta$ -TMR was added to the cells for 1.5 h. After removal  
144 of the reagents, the cells were kept in a growth medium for 30 min before flow cytometry  
145 analysis. For flow cytometry, the cells were washed twice with PBS and trypsinised. Cells of  
146 2 wells were resuspended in 300  $\mu$ l PBS and filtered through a 50  $\mu$ m nylon-mesh filter  
147 (Partec). The cells were analysed on a FACS Aria III flow cytometer (BD Biosciences) using  
148 FACSDiva acquisition software. Each treatment was carried out and analysed at least in  
149 triplicates. The gating was set using control cells without fluorophore and cells treated with  
150 A $\beta$ -TMR only. The percentage of cells containing A $\beta$ -TMR was calculated and normalised to

151 the mean of A $\beta$ -uptake without any inhibitor, resulting in a fold change, to make results from  
152 different experiments comparable. Kaluza Software (Beckman Coulter) was used for data  
153 analysis.

154

155 **Colocalization of internalized oA $\beta$ .** To study if oA $\beta$  was internalized within LAMP1 positive  
156 vesicles, different concentrations of oA $\beta$ -TMR of 250 nM, 500 nM and 1  $\mu$ M were added into  
157 the cells transfected with Lamp1-mGFP for time periods of 15 min, 30 min, 1 hour and 2 hours.  
158 oA $\beta$  (500nM and 1  $\mu$ M) internalization into the GPI positive vesicles were studied by  
159 incubating the oligomers for 15 min, 30 min and 1 hour into the cells transfected with GFP-  
160 GPI. Then images were taken after bleaching extracellular GFP-GPI by adding 0.4% Trypan  
161 blue (Sigma Aldrich) for 15 min and fixing with 4% PFA (Paraformaldehyde, Sigma Aldrich)  
162 for 15 min at room temperature and mounting with DABCO. oA $\beta$  (500nM and 1  $\mu$ M) and  
163 dextran FITC (1mg/ml) were co-incubated with the SH-SY5Y cells for 15 min, 30 min and 1  
164 h min at 37°C. Then images were captured for both live cells and cells fixed with 4% PFA.  
165 Cells were visualised using fluorescence microscopy and % of colocalization from Mander's  
166 overlapping coefficient were analyzed using ImageJ plugin Coloc 2 (open source by NIH,  
167 USA).

168

169 **Ca<sup>2+</sup> dependent plasma membrane repair assay by propidium iodide staining.**  
170 Undifferentiated SH-SY5Y cells were incubated with 1  $\mu$ M of oA $\beta$  for 1 h or 2 h at 37 °C in  
171 the presence and absence of 5 mM EGTA (without Ca<sup>2+</sup>) in DPBS buffer (PBS with Ca<sup>2+</sup> and  
172 Mg<sup>2+</sup> chloride). Then the cells were washed and stained with propidium iodide (PI, 5  $\mu$ g/ml)  
173 for 5 min. Cells were washed again two times with PBS before applying 4% PFA as fixative  
174 for 20 min at 4 °C. The fixed cells were observed by fluorescence microscopy or trypsinized  
175 before flow cytometry analysis.

176

177 **Immunocytochemistry.** Lysosomal exocytosis was verified by immunocytochemical staining  
178 of Lamp1 on the outer leaflet of the PM in unfixed cells, using an antibody directed to the  
179 luminal part of Lamp1 in undifferentiated SH-SY5Y neuroblastoma cells as described earlier  
180 <sup>27</sup>, on unfixed cells. Cells were incubated for 15 and 30 min with 1  $\mu$ M of oA $\beta$  in MEM media  
181 without FCS (fetal calf serum) supplement. Then, endocytosis of the cells was blocked with  
182 5% BSA + 10% FCS in PBS for 5 min at 4 °C. Then cells were incubated with Lamp1 anti-goat  
183 primary antibody (1:250, sc-8099, Santa Cruz Bio-technology; Santa Cruz, CA, USA; 2 h,  
184 4 °C) in the blocking buffer for 45 min, followed by fixation of the cells in 4% PFA for 20 min  
185 at 4 °C before labelling with the secondary anti-goat antibody conjugated to Alexa Fluor 488  
186 (1:400 for 30 min; Molecular Probes, Eugene, OR, USA). Next, the cells were mounted in  
187 ProLong Gold antifade reagent supplemented with 4',6-diamidino-2-phenylindole (DAPI;  
188 Molecular Probes). Conventional immunocytochemical staining was done to quantify the  
189 activated PAK1 and actin in oA $\beta$  and IPA-3 treated cells using phospho-PAK1 (Thr423)/PAK2  
190 (Thr402) antibody (Cell signalling #260; 1:150) and Phalloidin–Tetramethylrhodamine B  
191 isothiocyanate (Sigma P1951, 1:500). Anti-rabbit Alexa 405 and FITC (1:500) were used as  
192 secondary antibodies.

193

194 **Live cell imaging of membrane dynamics.** oA $\beta$  (1  $\mu$ M) was added concurrently with 1  $\mu$ M  
195 of the membrane binding dye TMA-DPH (N,N,N-Trimethyl-4-(6-phenyl-1,3,5-hexatrien-1-yl)  
196 phenylammonium p-toluenesulfonate; molecular formula: C<sub>28</sub>H<sub>31</sub>NO<sub>3</sub>S ) (10 mM of TMA-  
197 DPH stock solution was made by dissolving in methanol) and membrane dynamics of the live  
198 cells were followed by time-laps images using a confocal microscope. The excitation and  
199 emission maximum of TMA-DPH is 384 and 430 nm, with a considerable tail of excitation  
200 spectra at 405 nm. Therefore, time-lapse images were taken using a confocal-microscope by



201 exciting the TMA-DPH dye using the 405 nm laser and sufficient emission light was collected  
202 using an opened pinhole. In this setup confocal microscope produces images similar to the  
203 widefield or epifluorescence images. Cultures were carried to the microscope one by one in  
204 500  $\mu$ l of 20 mM HEPES buffer of pH 7.4 maintaining the temperature at 37°C. oA $\beta$  (1  $\mu$ M)  
205 was added concurrently with 1  $\mu$ M of membrane binding dye TMA-DPH to HEK cells  
206 similarly as above and membrane dynamics of the live cells were studied by images taken by  
207 fluorescent microscope.

208

209 **Cell viability assay.** Viability of differentiated cells were measured in triplicates using MTT  
210 reagent with the undifferentiated cells treated with oA $\beta$  (1 $\mu$ M) for 1 h with or without IPA-3  
211 (20  $\mu$ M) pretreated cells for 30 min at 37°C. Cells were incubated with MTT reagent for 2  
212 hours at 37°C, then removed all the media and measured the DMSO solubilized formazan.

213 Formazan (bright orange in color), the reduced MTT product produced by viable cells after 2  
214 h of incubation at 37°C was dissolved in DMSO and measured, at 570 nm using a Victor  
215 Wallac (PerkinElmer) plate reader.

216

217 **Confocal and fluorescence microscopy to image TNTs.** Formation of oA $\beta$  induced TNTs  
218 was observed in the cells treated with increasing concentrations of oA $\beta$  at different incubation  
219 times, using either confocal or fluorescence microscopes. The treatments were done by  
220 incubating the cells with oA $\beta$  in serum free medium and corresponding control cells were  
221 treated at the same conditions, to nullify the serum starvation induced TNTs. Differentiated,  
222 partially differentiated and undifferentiated cells on glass petri dishes were incubated with 100–  
223 500 nM oA $\beta$ –TMR for 3 h at 37°C in a 5% CO<sub>2</sub> atmosphere. The cells were imaged after  
224 incubating with LysoTracker (green; Invitrogen) 50-250 nM for 5-10 min and after extensive  
225 PBS washing (two washes of 10 min each at 37°C with 5% CO<sub>2</sub>). Images were acquired using

226 a Zeiss LSM laser scanning confocal microscope using 63X/1.4 NA or 40X/1.3 NA oil  
227 immersion plan-apochromatic objective (Carl Zeiss AG, Oberkochen, Germany). The time-  
228 laps image sequences of the live cells were taken at 37°C by capturing simultaneously  
229 differential interference contrast (DIC) and fluorescence modes. Fluorescence microscopy  
230 (IX73-Olympus) with 63X/1.3 NA and 100X1.4 NA was also used to do the experiments of  
231 SH-SY5Y cells transfected with Plenti-lifeact EGFP plasmid and CAAX-mCherry plasmid.  
232 To study the effect of IPA-3 on SH-SY5Y cells, the cells were first treated with IPA-3 (20  $\mu$ M)  
233 for 30 minutes followed by  $\alpha$ A $\beta$  (1  $\mu$ M) for 1 - 3 hours respectively. The cells were then imaged  
234 under microscopes and numbers of TNTs were quantified and plotted in percentage by manual  
235 counting the TNTs with respect to the number of cells from each of the image frames.

236

237 **Flow-cytometry.** Internalization of  $\alpha$ A $\beta$ -TMR in the presence and absence of inhibitors were  
238 quantified using BD FACS Aria <sup>TM</sup> (BD Biosciences) and were analysed using BD FACS  
239 DIVA <sup>TM</sup> (BD Biosciences) flow cytometer. Immunocytochemical stained cells with anti  
240 PAK1 and actin-phalloidin were fixed, trypsinised and suspended in PBS and quantified using  
241 BD LSR II (BD Biosciences) flow cytometer. Cells treated with propidium iodide (PI) were  
242 fixed, trypsinized and filtered using CellTrics 30  $\mu$ m filters (Sysmex). Then re-suspended in  
243 PBS and quantified different sets either using BD FACS Aria <sup>TM</sup> (BD Biosciences) or BD LSR  
244 II (BD Biosciences) flow cytometer and data were analysed using BD FACS DIVA <sup>TM</sup> (BD  
245 Biosciences) flow cytometer.

246

247 **Superresolution SIM images.** All SIM (structured illumination microscopy) images were  
248 acquired using on DeltaVision OMX SR microscope from GE Healthcare using a 60X 1.42  
249 NA objective and pco.edge sCMOS detector. The cells were fixed by 4% PFA by incubation

250 for 15 min and fixed cells were imaged. The widefield images were deconvolved using the  
251 built-in algorithm.

252

253 **Image analysis and statistics.** Image analysis was done using ImageJ software (open source  
254 by NIH, USA). Percentage of co-localization of oA $\beta$  (magenta) with lysosomes (green) was  
255 performed by calculating the proportion of the magenta fluorescence pixels compared to the  
256 co-localized pixels from the background subtracted images using the Coloc-2 plugin. The  
257 number of TNTs were distinguished from neurites by comprising a 3D-volume view of cells  
258 from confocal stacks using the volume view plugin in Image J software. Cells with blebs /  
259 lamellipodia and TNTs were counted from images and normalized to the total number of cells  
260 and represented in percentage. oA $\beta$  induced endocytosis was quantified by measuring the  
261 integrated intensities of internalized TMA-DPH from the luminal part of each cell by drawing  
262 ROI (region of interest) over sequences of time-laps confocal image stacks and comparing it  
263 with the same quantification of control cells. The fusion of lysosomal membrane to reseal the  
264 damaged membrane was detected as the appearance of LAMP1 (green) on the outer leaflet of  
265 the PM. The outer leaflet LAMP1 was quantified measuring the integrated intensities from  
266 drawn ROI and the proportionate percentage calculated comparing the total LAMP1 per cells.  
267 One-way ANOVA tests were performed to validate statistical significance in all experiments.

268

## 269 **Results**

270 **oA $\beta$  induced cellular stress instigates formation of TNTs and cell-to-cell pathology**  
271 **propagation.** Cell-to-cell propagation of oA $\beta$  between connected cells has been shown in  
272 earlier studies <sup>4,5,8,14</sup>. In our previous work <sup>4</sup>, we have shown asymmetric spreading of oA $\beta$   
273 along the dispersion of neurons path, when microinjected in a single neuron of a primary  
274 hippocampal culture <sup>4</sup>. Additionally, we showed transfer of oA $\beta$ -TMR from connected donor

275 to acceptor cells using a 3D donor-acceptor co-culture model with differentiated SH-SY5Y  
276 cells. However, the clear mechanism behind the cell-to-cell propagation remains to be revealed.  
277 Differentiated cells both in 2D and 3D culture form neurites and express several neuronal  
278 markers and characteristics of mature neurons, where 3D differentiated cells express tau  
279 subtypes better comparable to mature human neurons than 2D differentiated <sup>4,22</sup>. Here, we  
280 have observed that differentiated cells in 2D culture upon treatment with oA $\beta$ -TMR,  
281 morphologically exhibit lamellipodia, cell membrane expansion or blebs (yellow arrows) as  
282 well as tunneling nanotube-like (TNT-like) long thin conduits (white arrows) between  
283 neighbouring cells (Fig. 1B, Supplementary Movie 1). We did not observe significant numbers  
284 of TNT-like structures and membrane expansions/lamellipodia in the differentiated control  
285 cells (Fig. 1A). We have quantified the number of cells with blebs/lamellipodia and counted  
286 the number of TNT-like structures from bright field images with respect to the total number of  
287 cells from each of the image frames and presented as a percentage. The results show a  
288 concentration-dependent increase in oA $\beta$ -TMR treated cells (200-500 nM) compared to the  
289 control cells (Fig. 1C, D). We have detected the direct transfer of oA $\beta$ -TMR between the cells  
290 prominently (indicated by blue arrows) via these TNT-like conduits (Fig. 1E-F, Supplementary  
291 Movie 3-4) by time-lapse imaging. Transfer of organelles and oA $\beta$ -TMR (blue arrows) via  
292 TNT-like conduits extended from lamellipodia between cells (Yellow arrows), were observed  
293 in the cells incubated for 3 h with 100, 250 and 500 nM of oA $\beta$ -TMR (Supplementary Movies  
294 2-4).

295

296 In order to show that the studied TNT-like structures are indeed oA $\beta$  induced TNTs and not an  
297 artefact of differentiating reagents, we performed the experiments in partially differentiated  
298 (treated with retinoic acid for 7 days) and undifferentiated SH-SY5Y cells in parallel and  
299 confirmed that TNTs from 3D volumetric images obtained from confocal z-stacks. We have

300 observed thin TNT-like structures extended from expanded lamellipodia-like membrane  
301 protrusions in partially differentiated cells internalized with oA $\beta$ -TMR after incubation with  
302 250 nM of oligomers for 3 h (Fig. 2A-B), in contrast to the control cells (Fig. 2C). Moreover,  
303 the partially differentiated SH-SY5Y cells formed networks of TNT-like conduits between  
304 neighbouring cells (yellow arrow, Fig. 2B). The cells make networks between 3 neighbouring  
305 cells via TNT-like conduits (yellow arrows), and those were also extended from expanded  
306 lamellipodia (black arrows, Fig. 2A). We have observed the transfer of oA $\beta$ -TMR colocalized  
307 with LysoTracker labelled lysosomes (yellow arrows) from one cell to another via the TNT-like  
308 conduits extended from expanded lamellipodia (black arrows; Fig. 2D). To confirm that the  
309 cell-to-cell conduits visible in bright field images are TNTs, we have composed 3D volume  
310 view from confocal z-stacks of phalloidin stained f-actin structures between neighbouring cells  
311 (yellow arrows, Fig. 2E-F). In the 3D volume view, TNTs were distinguished from neurites by  
312 the characteristics of their capacity to stay hanging without touching the substratum even after  
313 fixing the cells (Fig. 2F). The lengths of the TNTs were between 0.2-16  $\mu$ m. Diameters of  
314 TNTs were measured from confocal z-stacks images of phalloidin stained cells and the values  
315 of majority (> 90%) of TNTs are within 240-960 nm measured at xy-plan (between 1-4 pixels,  
316 pixel size is 240 nm). However, around 10 % of TNTs are thicker and their diameters are in  
317 the range of  $1.23 \pm 0.27 \mu$ m. Finally, we have quantified the number of TNTs and neurites per  
318 cell in partially differentiated cells treated with 1  $\mu$ M of oA $\beta$ -TMR over time (1-3 h), and  
319 compared to the control cells (Fig. 2G-H). The results show increasing numbers of TNTs over  
320 the time (1-3 h) of oA $\beta$  (1  $\mu$ M) treatment (Fig. 2G). At the same time, we observed a significant  
321 decrease in the number of neurites per cells after 3 h of oA $\beta$  (1  $\mu$ M) treatment (Fig. 2H).  
322 Similarly, oA $\beta$  showed toxicity to the neurites of differentiated cells, which caused  
323 significantly reduce number of neurites per cell detected in a concentration and time dependent  
324 manner (Supplementary Fig. 1A-D).

325

326 **oA $\beta$  induced TNT formation precedes enhanced membrane activities and massive**  
327 **endocytosis.** We have designed the experiments using undifferentiated SH-SY5Y cells to  
328 ensure that it is the toxicity of oA $\beta$  that causes induction of TNT-like structures, and not the  
329 differentiating reagents. Cells were co-transfected with lifeact-EGFP and CAAX-mCherry, to  
330 stain actin and peripheral membrane proteins. We found formation of numerous co-stained  
331 TNT-like structures (yellow arrows) after 1h of oA $\beta$  (1  $\mu$ M) treatment, compared to the control  
332 cells (Fig. 3A-B). Further, the TNT-like structures were confirmed as a continuous extension  
333 of the PM and actin protrusions between two cells from 3D volume view from confocal z-  
334 stacks (Fig. 5B). Preceding the formation of oA $\beta$  induced TNTs, we have observed enhanced  
335 membrane activities along with the formation of membrane ruffles, filopodium, blebs and  
336 massive endocytosis compared to the control cells (Fig. 3C; Supplementary Movies 5-6).  
337 Enhanced membrane activities and endocytosis were detected immediately at the addition of  
338 oA $\beta$  (1  $\mu$ M). The oA $\beta$ -induced endocytosis was quantified by measuring the internalization of  
339 TMA-DPH into the luminal part of the cells, compared to the control cells (Fig. 3D). TMA-  
340 DPH is membrane impermeable and able to enter the control cells and to the cells treated with  
341 oA $\beta$  (1  $\mu$ M, for 15 min) only via endocytosis. On the other hand, the membrane impermeable  
342 dye TMA-DPH is able to enter the cells treated with oA $\beta$  (1  $\mu$ M) for 1 h, and the dye stains the  
343 whole cells (oA $\beta$  treated for 1 h) immediately at the addition (Fig. 3E). The result suggests that  
344 oA $\beta$  induced changes in the membrane fluidity.

345 To understand if the oA $\beta$  induced TNT formation is specific to neuronal cells or if it is a basic  
346 cellular process, we incubated HEK-293 cells with oA $\beta$  (1  $\mu$ M) for 1 h and observed formation  
347 of long TNTs hanging between distant neighbouring cells (Supplementary Fig. 2C). The  
348 number of TNT like conduits were significantly lower in control cells (Supplementary Fig. 2A-  
349 B). Similar to SH-SY5Y cells, the membrane of control HEK-293 cells found to be labelled

350 by TMA-DPH only at the periphery (Supplementary Fig. 2D). However, in the oA $\beta$  (1  $\mu$ M for  
351 1 h) treated HEK-293 cells, TMA-DPH labelled whole cells by entering the cells immediately  
352 on addition. Additionally, these cells also showed TNT-like protrusions (Supplementary Fig.  
353 2E). Results suggest oA $\beta$  induced change in membrane fluidity and increased number of TNT-  
354 like structures.

355

356 **oA $\beta$ <sub>1-42</sub> induces membrane damage and lysosomal exocytosis.** oA $\beta$  induces TNT formation  
357 in association with the substantial enhancement of membrane activities and massive  
358 endocytosis, similarly as evident in Ca<sup>2+</sup> dependent repair of injured PM by lysosomal  
359 exocytosis<sup>28</sup>. We have observed that the oA $\beta$ -TMR (magenta) was efficiently internalized into  
360 early endosomes (Rab5 positive organelles), followed by entry into multivesicular bodies  
361 (MVB) or lysosomes (Lamp1 positive organelles) (Fig. 3F). The spontaneous internalizations  
362 of extracellularly applied oA $\beta$ -TMR (250 nM to 1  $\mu$ M, incubated for 15 min to 1 h) into  
363 undifferentiated cells were quantified and results showed that  $70 \pm 9\%$  of oA $\beta$ -TMR (250 nM)  
364 ended up in Lamp1 positive organelles after 15 min of incubation (Supplementary Fig. 3A-B).  
365 Images in Fig. 3F, present the colocalization of oA $\beta$ -TMR (1  $\mu$ M) after 30 min of incubation.  
366 This inspired us to determine if oA $\beta$  caused PM damage. The Gold standard to detect PM repair  
367 by lysosomal exocytosis and formation of a patch over the damaged membrane is to detect the  
368 luminal part of the lysosomal membrane protein LAMP-1 exposed on the outer leaflet of the  
369 plasma membrane. Accordingly, we have observed transiently transfected Lamp1-mGFP  
370 distributed in large extent in the periphery of the PM within 15 to 30 min of oA $\beta$  (1  $\mu$ M)  
371 treatment, compared to the control cells (Fig. 3G upper panel). We have quantified oA $\beta$  (1  $\mu$ M)  
372 induced Lamp1 on the PM, in undifferentiated SH-SY5Y cells within 15-30 min of exposure  
373 by surface staining of the cells (Fig. 3G lower panel & Fig. 3H). To verify that the process is  
374 calcium dependent, we analysed the influx of the membrane-impermeant dye propidium iodide



375 (PI) in presence of 5 mM EGTA in PBS. The rationale behind this experiment is that if  
376 lysosomal exocytosis-dependent PM repair is occurring, then chelation of  $\text{Ca}^{2+}$  will prevent the  
377 repair and PI will be detected intracellularly. As seen in Fig. 3I-M, significant enhancement of  
378 PI staining in absence of calcium was detected 30 min, 1h and 2 h after exposure to oA $\beta$  as  
379 quantified by flow cytometry (Fig. 3K-M) and confocal imaging (Fig.3O). In the presence of  
380  $\text{Ca}^{2+}$  increased PI staining was not detected with oA $\beta$  treatments (Fig. 3I-J). The quantification  
381 of internalized PI was compared by plotting median fluorescence intensity, as fluorescence  
382 histogram profiles are bimodal in nature (Fig.3N). The presented dot plot of PI internalization  
383 after 30 min of  $\text{Ca}^{2+}$  chelation in the presence and absence of oA $\beta$  (1  $\mu\text{M}$ ) (Fig. 3M). The results  
384 show an increasing amount of internalization of PI with time even in the control cells, however  
385 the differences between control and oA $\beta$  (1  $\mu\text{M}$ ) treated cells are significant at both 30 min and  
386 1 h time point, and even at 2 h time point differences are detectable. The results suggest that  
387  $\text{Ca}^{2+}$  dependent membrane repair is a continuous process even in the control cells, and oA $\beta$   
388 induced membrane damage accelerates the process. Thus, we conclude that the addition of oA $\beta$   
389 causes damage to the PM and as a result of rapid membrane repair process occurs, by enhancing  
390 the process of lysosomal exocytosis and fusion of lysosomal membrane with the PM.  
391 Subsequent to the membrane repair process, re-establishment of the PM occurs by removing  
392 membrane parts through endocytosis and as a consequence, oA $\beta$  is internalized into  
393 MVB/lysosomes (Lamp1 positive organelles) (Fig. 3F and Supplementary Fig. 3A-B).

394

395 **Involvement of the actin cytoskeleton remodeling kinase PAK1 engaged endocytosis in**  
396 **the internalization of oA $\beta$ <sub>1-42</sub>.** We next wanted to determine the exact mechanism of the  
397 massive internalization of oA $\beta$ . To identify the mechanisms of internalization of oA $\beta$ , partially  
398 differentiated SH-SY5Y cells were pre-treated with different inhibitors against the uptake of  
399 A $\beta$  as suggested in the literature. We have used partially differentiated cells, because N-methyl-



400 D-aspartate (NMDA) receptors,  $\alpha$ -amino-3-hydroxy-5-methyl-4-isoxazolepropionic acid  
401 (AMPA) receptors and nicotinic acetylcholine receptors (nAChR) are known to be present on  
402 RA treated partially differentiated SH-SY5Y cells <sup>29</sup> and have previously been shown to  
403 mediate the internalization of A $\beta$  <sup>30-32</sup>. To inhibit the function of these receptors, antagonists  
404 against NMDA receptors (AP-5), AMPA receptors (GYKI 52466) and nAChR ( $\alpha$ -  
405 Bungaratoxin) were used and oA $\beta$ -TMR uptake was quantified by flow cytometry. However,  
406 no change in the uptake of oA $\beta$  was found (Fig. 4A).

407 To determine the mechanism of A $\beta$ -uptake several inhibitors that affect different variants of  
408 endocytosis and macropinocytosis were tested. After pre-treatment with the inhibitors, the cells  
409 were treated with oA $\beta$ -TMR and quantified by flow cytometry (Fig. 4B-C). The percentage of  
410 oA $\beta$ -positive cells was normalized to the mean percentage of oA $\beta$ -uptake and the fold-change  
411 upon inhibitor treatment was calculated. MDA and PAO, which are inhibitors of clathrin-  
412 mediated endocytosis, <sup>33</sup> and DPA, which functionally inhibits acid sphingomyelinases <sup>34</sup> could  
413 not prevent the uptake. Similarly, the dynamin inhibitor dynasore <sup>35</sup>, and an amiloride  
414 analogue, EIPA that acts as a specific inhibitor of macropinocytosis through inhibition of  
415 Na<sup>+</sup>/H<sup>+</sup> exchangers <sup>36</sup> had no effect. However, we found significantly reduced oA $\beta$ -uptake  
416 when using bafilomycin A1 (Baf) and NH<sub>4</sub>Cl, which both affect the lysosomal acidification  
417 and consequently fusing between vesicles <sup>37</sup> and the PAK1 inhibitor IPA-3 that inhibits actin  
418 regulated endocytosis similar as macropinocytosis by modulating PAK1 dependent actin  
419 polymerization <sup>38,39</sup>. PAK1 has an autoregulatory domain which is targeted by the inhibitor  
420 IPA-3, although the exact downstream inhibitory signalling pathway of IPA-3 is not known yet  
421 <sup>38</sup>. To establish if the oA $\beta$  internalization in undifferentiated SH-SY5Y cells occurs similarly  
422 via PAK1 dependent endocytosis, we also quantified the internalization in undifferentiated  
423 cells and the quantification showed similar results, Fig. 4D shows the representative confocal  
424 images.

425

426 Involvement of PAK1 has been reported mostly in membrane tension and cholesterol sensitive  
427 clathrin-independent endocytosis (CIE) and in membrane modulating actin dependent  
428 endocytosis such as, macropinocytosis, IL2R $\beta$  endocytosis, CLIC/GEEC (clathrin-independent  
429 carrier/ glycosylphosphatidylinositol-anchored protein enriched compartment) pathway<sup>39,40</sup>. It has  
430 been shown that PAK1 specifically regulates macropinocytosis by following the uptake of 70k  
431 Da dextran, a specific marker of fluid phase macropinocytosis<sup>41</sup>. Therefore, we have followed  
432 the fate of internalization of Dextran-70 kDa with oA $\beta$  pulses. However, after 1 h of oA $\beta$ -TMR  
433 (1  $\mu$ M) treatment only small amounts of internalized dextran-FITC were detectable and there  
434 was no significant colocalization with internalized oA $\beta$ -TMR (Fig. 4E). Similarly,  
435 internalizations of oA $\beta$  were observed in the GFP-GPI (GFP- glycosylphosphatidylinositol)  
436 transiently transfected SH-SY5Y cells, and the internalized oligomers were not colocalized  
437 with GFP-GPI in the cells treated for 1 h with oA $\beta$ -TMR (1  $\mu$ M) (Fig. 4E) and oligomers did  
438 not enhance the GFP-GPI internalization observed after 15 - 30 min of oA $\beta$  (0.5 nM to 1  $\mu$ M)  
439 treatment. The results indicate that oA $\beta$  follows PAK1 dependent CIE machineries, which is  
440 distinct from macropinocytosis or the CLIC/GEEC pathway. The same observations were also  
441 reported recently<sup>39</sup> although the complete mechanism is not fully understood.

442

443 **Active PAK1 in the oA $\beta$  induced formation of TNTs.** Active PAK1 regulates cortical actin  
444 polymerization, directional movements and also polarized lamellipodia at the leading edge<sup>42</sup>.  
445 Actin depolymerizing drugs such as latrunculin and cytochalasin impair TNTs formation<sup>17</sup>.  
446 Therefore, the next step was to observe the role of PAK1 in the oA $\beta$  induced formation of  
447 TNTs and if inhibition of oA $\beta$  uptake by IPA-3 also prevented the formation of TNTs. Thus,  
448 oA $\beta$  induced formation of TNTs in undifferentiated SH-SY5Y cells was quantified by creating  
449 3D volume view from z-stacks images (Fig. 5B) of phalloidin and anti PAK1/2-Thr423 stained

450 conduits between neighbouring cells at fixed condition (Fig. 5A). Number of TNTs was  
451 quantified in cells treated with 1  $\mu$ M of oA $\beta$  for 1-3 h, compared to the control cells (Fig. 5C)  
452 and results show a significant time dependent increase in the number of TNTs after oA $\beta$   
453 treatment. Paraformaldehyde fixation might break or damage the thin TNTs. Thus, TNTs were  
454 also quantified by staining f-actin in live cells by transiently transfecting with the lifeact-EGFP  
455 plasmid (Fig. 5E). Transfection did not affect the ability of cell to form TNT-like structures  
456 and the increased number of TNT-like structures in oA $\beta$  treated cells as compared to the  
457 controls maintained. Cells that were treated with IPA-3 showed a decrease in number of TNTs  
458 (Fig. 5D-E), images were quantified from live cells as well as from fixed condition (Fig. 5D).  
459 The quantification of TNTs in the live cells was higher but the pattern is similar to the fixed  
460 cells, which were quantified from phalloidin stained TNTs images by analysing in 3D volume  
461 view from the confocal Z-stacks (Fig. 5E). Morphologically, IPA-3 treated cells were rounder  
462 than the controls and oA $\beta$  treated cells, however MTT assay showed no significant change in  
463 the cell viability (Supplementary Fig. 4A).

464

#### 465 **oA $\beta$ induced activation of phospho-PAK1 modulates f-actin and formation of TNTs.**

466 Distinct differences in f-actin structures between oA $\beta$  treated and the oA $\beta$  + IPA-3 treated cells  
467 were detected by observing the lifeact EGFP plasmid labelled f-actin structures at a resolution  
468 of < 130 nm using Superresolution SIM (Structured Illumination Microscopy) images. TNTs  
469 were observed to be a continuous extension of long cortical f-actin in oA $\beta$  treated cells (Fig.  
470 5F and Fa). 3D volume view of the xyz-plane demonstrated that membrane actin protrusion  
471 did not grow on the surface like neurites. Rather, they were ‘hanging’ between two  
472 neighbouring cells, which is one of the characteristics distinguishing features of TNTs (Fig.  
473 5Fb). In the Fig.5G, the disruptions of long actin fibres in IPA-3 pre-treated cells reveal PAK1  
474 play an important role in f-actin modulation and thereby TNT formation. Experiments were

475 done with undifferentiated sparsely seeded SH-SY5Y cells to quantify actin stained TNTs like  
476 structures between relatively distant cells (Supplementary Fig. 4B).  
477 Images of immunocytochemical staining using phospho-PAK1 (Thr423)/PAK2 (Thr402)  
478 antibody demonstrated increased levels of activated phospho-PAK1 with time (1-3 h) of oA $\beta$   
479 (1 $\mu$ M) treatment (Fig. 6A-B). The confocal images were represented as z-projected stacks and  
480 the intensities were compared from z-projected images, taken at the same settings of laser  
481 power and exposure. Co-staining of activated phospho-PAK1 with f-actin on TNT structures  
482 were confirmed from the 3D-volume view analysis (Fig. 5A-B & 6A). Upregulation of  
483 activated phospho-PAK1 by oA $\beta$  (1 $\mu$ M) treatment was quantified further from epi-  
484 fluorescence images, where images were taken from more than 80 cells from each set using  
485 20X magnification objective and at the same exposure and settings (Fig. 6C). The results show  
486 a higher level of activated phospho-PAK1 in oA $\beta$  (1 $\mu$ M) after 1 h treatment of cells in  
487 comparison to the control and IPA-3 pretreated cells (Fig. 6D). Further quantifications were  
488 done by flow cytometry using immunocytochemical stained cells. The results obtained from  
489 the histograms of flow cytometric data showed higher expression of phospho-PAK1 and  
490 phalloidin bound actin in oA $\beta$  treated cells as compared to control, IPA-3 and IPA-3 + oA $\beta$   
491 treated cells (Fig. 6F-G). Quantification of TNT-like cell-to-cell phalloidin stained actin  
492 extensions with respect to the level of activated phospho-PAK1 showed a positive correlation  
493 when quantified observing a larger number of cells (Fig. 6E).

494

## 495 **Discussion.**

496 Prion-like cell-to-cell propagation is a common characteristic of neurodegenerative diseases.  
497 Several reports have consistently reported direct cell-to-cell propagation of neurodegenerative  
498 protein aggregates and their implications in the gradual pathology progression<sup>2,3</sup>. Several  
499 studies have suggested exosomes as a means of cell-to-cell transfer of A $\beta$ <sup>13,14</sup>. On the other

500 hand, studies using the method of transwell assays have also shown the efficient cell-to-cell  
501 transfer of prion proteins despite the blocking of exosome transfer<sup>9,43</sup>. Moreover, an increasing  
502 number of reports show that cell-to-cell transfer of neurodegenerative proteins, such as PrP<sup>Sc</sup>,  
503  $\alpha$ -synuclein, tau, polyQ aggregates and A $\beta$ , via TNTs instigate new avenues<sup>8-11</sup>. oA $\beta$  induced  
504 formation of TNTs in primary neurons and astrocytes has already been reported<sup>8</sup>. Here we  
505 have focused more on possible mechanism of oA $\beta$  induced formation of TNTs in differentially  
506 differentiated SH-SY5Y neuronal cells. Due to its cancerous origin, the SH-SY5Y cell line  
507 shows a number of genetic aberrations and different differentiation protocols generate  
508 variations in neuronal properties, but most genes and pathways dysregulated in AD  
509 pathogenesis stay intact even in undifferentiated SHSY5Y cells. Moreover, its differentiation  
510 to cholinergic neurons like properties in retinoic acid treated SHSY5Y cells a widely accepted  
511 model system in AD research<sup>22</sup>.

512

513 Increasingly, clinical studies and animal models indicate that soluble oA $\beta$  is the disease  
514 initiator and driver, rather than large extracellular depositions. Accumulation of amyloidogenic  
515 proteins in lysosomes, abnormal lysosomal morphology and lysosomal membrane  
516 permeabilization are major hallmark of neurodegenerative diseases. Notably, lysosomal stress  
517 as well as damage due to accumulation of non-degradable amyloidogenic aggregates could  
518 induce the formation of TNTs<sup>12</sup>. Stress signals from lysosomes dysregulate various cellular  
519 processes and mediate increased oxidative stress<sup>12,44-46</sup>. Several studies have indicated that  
520 ROS (reactive oxygen species) induced cellular stress enhances TNT formation<sup>8,17</sup>.

521 In contrast, the study<sup>47</sup>, demonstrated that the impaired processing of A $\beta$  due to lysosomal  
522 enzymatic inefficiency can enhance exocytosis. Additionally, a related protein of the exocyst  
523 complex M-sec, involved in exosome fusion and membrane expansion, regulates formation of  
524 TNTs<sup>21</sup>. PM recruitment of Ral-GTPase and filamin, both actin remodeling proteins, also

525 indicate positive regulating effects in TNT formation <sup>21</sup>. The study presented here also  
526 demonstrates membrane expansion in the form of blebs, filopodium-like structures and  
527 extension of TNTs from expanded lamellipodia. Previous reports have indicated that synthetic  
528  $\alpha$ A $\beta$  makes ion-permeable pores in synthetic membranes <sup>48,49</sup>. Recently, it was also shown that  
529  $\alpha$ A $\beta$  can induce a membrane repair response similar to that induced by exposure to the bacterial  
530 pore-forming toxin produced by *B. thuringensis* <sup>50</sup>. Consequently, enhanced internalization of  
531 A $\beta$  occurs via endocytosis, which is independent of receptor interactions. Involvement of the  
532 clathrin- and dynamin-independent endocytosis is also relevant in maintaining cellular  
533 homeostasis by regulating membrane stress and cell surface expansion <sup>39,51</sup>. A recent study  
534 reported that A $\beta$  follows membrane tension sensitive and Rho GTPase family regulated actin-  
535 dependent CIE <sup>39</sup>. Furthermore, A $\beta$  uptake was earlier shown to be inhibited by nocodazole  
536 and cytochalasin-D, the inhibitors of tubulin depolymerization and actin polymerization, by  
537 preventing fluid phase-endocytosis in microglia and astrocytoma cells <sup>52</sup>. The results of this  
538 study show that the internalization of  $\alpha$ A $\beta$  through massive endocytosis is clathrin-  
539 independent, but rather follows PAK1-dependent membrane actin modulating endocytosis  
540 machineries.

541 PAK1 is a serine/threonine kinase found in the cytoplasm and nucleus of cells and PAK1 is  
542 important in regulating cytoskeleton remodelling, phenotypic signalling, gene expressions and  
543 it affects a variety of cellular processes <sup>42</sup>. In addition, PAK1 acts downstream of the small  
544 GTPases Cdc42 and Rac1, which interact with many effector proteins, including Arp2/3, which  
545 in turn can have an effect on cytoskeleton reorganization <sup>53</sup>. In addition, the role of CDC42 and  
546 Rho-GTPases in TNT formation is not fully investigated. A report <sup>54</sup>, demonstrated that the  
547 activity of CDC42 and Rho-GTPases positively contributes to the formation of TNTs in  
548 macrophages. In contrast, another study <sup>55</sup>, found that CDC42/IRSp53/VASP negatively  
549 regulates the formation of TNTs. PAK activation can occur independent of Rac and CDC42,

550 the specific lipids particularly sphingolipids can directly activate PAK<sup>56</sup>. A $\beta$  internalization in  
551 primary neurons in absence of apolipoprotein-E has been reported by a cholesterol and  
552 sphingolipid sensitive lipids rafts mediated clathrin and caveolae independent but dynamin  
553 dependent pathway<sup>57,58</sup>. The mechanism is similar to actin-dependent IL2R $\beta$  endocytosis<sup>40</sup>.  
554 AD is highly associated with changes in lipid composition of neurons, and A $\beta$ 42 directly  
555 downregulates sphingomyelin levels and the ratio of A $\beta$ 40/A $\beta$ 42 regulates membrane  
556 cholesterol<sup>59</sup>. Here we have detected substantial changes in membrane fluidity upon oA $\beta$   
557 treatment using the membrane dye TMA-DPH together with rapid endocytosis. On the other  
558 hand, oA $\beta$  is implicated in PAK1 dependent synaptic dysfunctions and PAK1 is aberrantly  
559 activated and translocated from the cytosol to the membrane during the development of  
560 pathology in the AD brain<sup>60</sup>. Interestingly, HIV and HSV viruses exploit PAK1 dependent  
561 endocytosis *en route* and recent studies have also shown direct cell-to-cell spreading of HIV  
562 and HSV via TNTs<sup>19</sup>. Another study has shown that the HIV-1 Nef protein mediated TNT  
563 formation is associated with 5 proteins of the exocyst complex and that they are involved in a  
564 PAK2 and Rab 11 dependent pathway<sup>61</sup>. Additionally, alpha herpes virus induced TNT-like  
565 membrane actin projections depends on the conserved viral US3 serine/threonine protein  
566 kinase-dependent modulations of the cytoskeleton. These modulations are caused by activation  
567 of PAK1-dependent signalling and inhibition by IPA-3 attenuates these TNT-like projections  
568<sup>62,63</sup>. Exocytosis is involved in the expansion of cell surface area and results in decreased  
569 membrane stress. Reduced membrane stress also arises during PM repair, due to extensive  
570 exocytosis events<sup>64</sup>. Endosome recycling also plays a big role in maintaining membrane  
571 surface area in equilibrium<sup>65</sup>. Interestingly, the role of vesicle recycling in TNT formation has  
572 been evaluated in a recent study carried out on CAD cells, where an increased level of Rab  
573 11a, Rab 8a and VAMP3 were reported in correlation to TNTs<sup>66</sup>.



574 A $\beta$  induced formation of TNTs in primary neurons and astrocytes has been reported earlier<sup>8</sup>.  
575 Here, we have shown the oA $\beta$  induced formation of TNTs can transfer aggregates directly  
576 between differentiated neurons and the transferred oligomers develop gradual pathology. TNTs  
577 as a mean of direct neuron-to-neuron transfer is a convincing model of how oligomers that are  
578 suggested as an initiator or driver of AD pathology could gradually progress through the  
579 anatomically connected brain regions. However, the possibility of pathology transfer via  
580 exosomes could be a parallel mechanism, since we have observed that the formation of TNTs  
581 is followed by oA $\beta$  induced enhanced lysosomal exocytosis. Therefore, further in-depth studies  
582 are needed to understand how cells maintain homeostasis of intercellular communication by  
583 balancing exosome release and TNTs in the stressed cells. Altogether, our results have  
584 indicated that TNTs are characteristic membrane actin conduit that transfer oA $\beta$  aggregates  
585 from one cell-to-another, and are formed as a consequence of oA $\beta$  induced membrane damage  
586 and Ca<sup>2+</sup> dependent lysosomal-exocytosis engaged rapid membrane repair process, followed  
587 by PAK1-kinase dependent CIE and actin remodelling (Fig. 7), probably to maintain cell  
588 surface area expansion and membrane stress in equilibrium.

589

590 **Author Contributions.** S.N conceived and conducted the research; S.N and K.O designed  
591 research; S.N designed tunneling nanotubes, oA $\beta$  internalization and PAK1 experiments; K.O.  
592 designed membrane dynamics and membrane repair experiments; A.D, D.K.V, N.D, C.K and  
593 S.N performed experiments and analysed the data; S.N, K.O and K.K interpreted data; S.N  
594 wrote the paper taking valuable inputs from all the authors.

595

596 Authors have no Competing Interests.

597



598 **Acknowledgement.** SN thanks to Manipal Academy of Higher Education intramural grants  
599 (India; 2019-2022), Magnus Bergvalls (Sweden, 2015-2016, #2014-00192), Gun och Bertil  
600 Stohnes research grants (Sweden, 2014-2015) and Alzheimer fonden (Sweden; 2012-2013).  
601 We thank our long-term collaborator Prof. Martin Hallbeck of Linkoping University, Sweden,  
602 for the valuable suggestions on designing of cell-to-cell transfer experiments. We thank Dr.  
603 Ravi Manjithaya of JNCASR, Bangalore, India, for giving us SH-SY5Y cell lines and giving  
604 access to the SIM-superresolution microscope. Thanks a lot to Likhesh Sharma, PhD, Product  
605 Manager GE Healthcare for assisting with imaging by SIM-superresolution microscope. We  
606 thank Prof. Satyajit Mayor of National centre for biological sciences, India, for his kind gift of  
607 GFP-GPI construct, CAAX-mCherry plasmid, sharing of some reagents and for his valuable  
608 inputs. The CAAX-mCherry plasmid was a kind gift to Prof. Satyajit Mayor by Prof. Jacco van  
609 Rheenen of Hubrecht Institute for Developmental Biology and Stem Cell Research. Thanks to  
610 Prof. Subba Rao Gangi Setty of Indian Institute of Science and Prof. Gopal Pande of Manipal  
611 institute of higher education, India, for their valuable inputs.

612

### 613 **References.**

- 614 1. Hardy, J. & Selkoe, D. J. The amyloid hypothesis of Alzheimer's disease: Progress and  
615 problems on the road to therapeutics. *Science* (2002). doi:10.1126/science.1072994
- 616 2. Hallbeck, M., Nath, S. & Marcusson, J. Neuron-to-neuron transmission of  
617 neurodegenerative pathology. *Neuroscientist* **19**, 560–566 (2013).
- 618 3. Brundin, P., Melki, R. & Kopito, R. Prion-like transmission of protein aggregates in  
619 neurodegenerative diseases. *Nature Reviews Molecular Cell Biology* (2010).  
620 doi:10.1038/nrm2873
- 621 4. Nath, S. *et al.* Spreading of neurodegenerative pathology via neuron-to-neuron  
622 transmission of  $\beta$ -amyloid. *J. Neurosci.* **32**, (2012).
- 623 5. Domert, J. *et al.* Spreading of amyloid- $\beta$  peptides via neuritic cell-to-cell transfer is  
624 dependent on insufficient cellular clearance. *Neurobiol. Dis.* **65**, 82–92 (2014).
- 625 6. Gouras, G. K., Tampellini, D., Takahashi, R. H. & Capetillo-Zarate, E. Intraneuronal  
626  $\beta$ -amyloid accumulation and synapse pathology in Alzheimer's disease. *Acta*  
627 *Neuropathologica* **119**, 523–541 (2010).
- 628 7. Walsh, D. M. & Selkoe, D. J. Deciphering the molecular basis of memory failure in

- 629 Alzheimer's disease. *Neuron* **44**, 181–93 (2004).
- 630 8. Wang, Y., Cui, J., Sun, X. & Zhang, Y. Tunneling-nanotube development in astrocytes  
631 depends on p53 activation. *Cell Death Differ.* **18**, 732–742 (2011).
- 632 9. Gousset, K. *et al.* Prions hijack tunnelling nanotubes for intercellular spread. *Nat. Cell*  
633 *Biol.* **11**, 328–336 (2009).
- 634 10. Tardivel, M. *et al.* Tunneling nanotube (TNT)-mediated neuron-to neuron transfer of  
635 pathological Tau protein assemblies. *Acta Neuropathol. Commun.* **4**, 117 (2016).
- 636 11. Dieriks, B. V. *et al.*  $\alpha$ -synuclein transfer through tunneling nanotubes occurs in SH-  
637 SY5Y cells and primary brain pericytes from Parkinson's disease patients. *Sci. Rep.* **7**,  
638 (2017).
- 639 12. Victoria, G. S. & Zurzolo, C. The spread of prion-like proteins by lysosomes and  
640 tunneling nanotubes: Implications for neurodegenerative diseases. *Journal of Cell*  
641 *Biology* **216**, 2633–2644 (2017).
- 642 13. Rajendran, L. *et al.* Alzheimer's disease beta-amyloid peptides are released in  
643 association with exosomes. *Proc. Natl. Acad. Sci.* **103**, 11172–11177 (2006).
- 644 14. Sardar Sinha, M. *et al.* Alzheimer's disease pathology propagation by exosomes  
645 containing toxic amyloid-beta oligomers. *Acta Neuropathol.* **136**, 41–56 (2018).
- 646 15. Sartori-Rupp, A. *et al.* Correlative cryo-electron microscopy reveals the structure of  
647 TNTs in neuronal cells. *Nat. Commun.* (2019). doi:10.1038/s41467-018-08178-7
- 648 16. Gerdes, H. H., Rustom, A. & Wang, X. Tunneling nanotubes, an emerging  
649 intercellular communication route in development. *Mech. Dev.* **130**, 381–387 (2013).
- 650 17. Rustom, A., Saffrich, R., Markovic, I., Walther, P. & Gerdes, H. H. Nanotubular  
651 Highways for Intercellular Organelle Transport. *Science (80-. )*. **303**, 1007–1010  
652 (2004).
- 653 18. Onfelt, B., Nedvetzki, S., Yanagi, K. & Davis, D. M. Cutting edge: Membrane  
654 nanotubes connect immune cells. *J. Immunol.* **173**, 1511–3 (2004).
- 655 19. Jansens, R. J. J., Tishchenko, A. & Favoreel, H. W. Bridging the Gap: Virus Long-  
656 Distance Spread via Tunneling Nanotubes. *J. Virol.* (2020). doi:10.1128/jvi.02120-19
- 657 20. Davis, D. M. & Sowinski, S. Membrane nanotubes: Dynamic long-distance  
658 connections between animal cells. *Nature Reviews Molecular Cell Biology* **9**, 431–436  
659 (2008).
- 660 21. Hase, K. *et al.* M-Sec promotes membrane nanotube formation by interacting with Ral  
661 and the exocyst complex. *Nat. Cell Biol.* **11**, 1427–1432 (2009).
- 662 22. Agholme, L., Lindström, T., Kgedal, K., Marcusson, J. & Hallbeck, M. An in vitro  
663 model for neuroscience: Differentiation of SH-SY5Y cells into cells with  
664 morphological and biochemical characteristics of mature neurons. *J. Alzheimer's Dis.*  
665 **20**, 1069–1082 (2010).
- 666 23. Falcón-Pérez, J. M., Nazarian, R., Sabatti, C. & Dell'Angelica, E. C. Distribution and  
667 dynamics of Lamp1-containing endocytic organelles in fibroblasts deficient in BLOC-  
668 3. *J. Cell Sci.* (2005). doi:10.1242/jcs.02633

- 669 24. Van Rheenen, J. *et al.* EGF-induced PIP2 hydrolysis releases and activates cofilin  
670 locally in carcinoma cells. *J. Cell Biol.* (2007). doi:10.1083/jcb.200706206
- 671 25. Nichols, B. J. *et al.* Rapid cycling of lipid raft markers between the cell surface and  
672 golgi complex. *J. Cell Biol.* (2001). doi:10.1083/jcb.153.3.529
- 673 26. Paladino, S., Pocard, T., Catino, M. A. & Zurzolo, C. GPI-anchored proteins are  
674 directly targeted to the apical surface in fully polarized MDCK cells. *J. Cell Biol.*  
675 (2006). doi:10.1083/jcb.200507116
- 676 27. Wäster, P., Eriksson, I., Vainikka, L., Rosdahl, I. & Öllinger, K. Extracellular vesicles  
677 are transferred from melanocytes to keratinocytes after UVA irradiation. *Sci. Rep.* **6**,  
678 (2016).
- 679 28. Idone, V. *et al.* Repair of injured plasma membrane by rapid Ca<sup>2+</sup> dependent  
680 endocytosis. *J. Cell Biol.* **180**, 905–914 (2008).
- 681 29. Xie, H. R., Hu, L. Sen & Li, G. Y. SH-SY5Y human neuroblastoma cell line: In vitro  
682 cell model of dopaminergic neurons in Parkinson's disease. *Chinese Medical Journal*  
683 (2010). doi:10.3760/cma.j.issn.0366-6999.2010.08.021
- 684 30. Bi, X., Gall, C. M., Zhou, J. & Lynch, G. Uptake and pathogenic effects of amyloid  
685 beta peptide 1-42 are enhanced by integrin antagonists and blocked by NMDA  
686 receptor antagonists. *Neuroscience* (2002). doi:10.1016/S0306-4522(02)00132-X
- 687 31. Zhao, W. Q. *et al.* Inhibition of calcineurin-mediated endocytosis and  $\alpha$ -amino-3-  
688 hydroxy- 5-methyl-4-isoxazolepropionic acid (AMPA) receptors prevents amyloid  $\beta$   
689 oligomer-induced synaptic disruption. *J. Biol. Chem.* (2010).  
690 doi:10.1074/jbc.M109.057182
- 691 32. Yang, W. N. *et al.* Mitogen-activated protein kinase signaling pathways are involved  
692 in regulating  $\alpha 7$  nicotinic acetylcholine receptor-mediated amyloid- $\beta$  uptake in SH-  
693 SY5Y cells. *Neuroscience* (2014). doi:10.1016/j.neuroscience.2014.08.013
- 694 33. Guo, S. *et al.* Selectivity of commonly used inhibitors of clathrin-mediated and  
695 caveolae-dependent endocytosis of G protein-coupled receptors. *Biochim. Biophys.*  
696 *Acta - Biomembr.* (2015). doi:10.1016/j.bbamem.2015.05.024
- 697 34. Kornhuber, J. *et al.* Identification of novel functional inhibitors of acid  
698 sphingomyelinase. *PLoS One* (2011). doi:10.1371/journal.pone.0023852
- 699 35. Macia, E. *et al.* Dynasore, a Cell-Permeable Inhibitor of Dynamin. *Dev. Cell* (2006).  
700 doi:10.1016/j.devcel.2006.04.002
- 701 36. Mercer, J. & Helenius, A. Virus entry by macropinocytosis. *Nature Cell Biology*  
702 (2009). doi:10.1038/ncb0509-510
- 703 37. Poëa-Guyon, S. *et al.* The V-ATPase membrane domain is a sensor of granular pH that  
704 controls the exocytotic machinery. *J. Cell Biol.* (2013). doi:10.1083/jcb.201303104
- 705 38. Deacon, S. W. *et al.* An Isoform-Selective, Small-Molecule Inhibitor Targets the  
706 Autoregulatory Mechanism of p21-Activated Kinase. *Chem. Biol.* (2008).  
707 doi:10.1016/j.chembiol.2008.03.005
- 708 39. Wesén, E., Lundmark, R. & Esbjörner, E. K. Role of Membrane Tension Sensitive  
709 Endocytosis and Rho GTPases in the Uptake of the Alzheimer's Disease Peptide

- 710 A $\beta$ (1-42). *ACS Chem. Neurosci.* (2020). doi:10.1021/acchemneuro.0c00053
- 711 40. Doherty, G. J. & McMahon, H. T. Mechanisms of Endocytosis. *Annu. Rev. Biochem.*  
712 (2009). doi:10.1146/annurev.biochem.78.081307.110540
- 713 41. Dharmawardhane, S. *et al.* Regulation of macropinocytosis by p21-activated kinase-1.  
714 *Mol. Biol. Cell* (2000). doi:10.1091/mbc.11.10.3341
- 715 42. Sells, M. A., Boyd, J. T. & Chernoff, J. p21-Activated kinase 1 (Pak1) regulates cell  
716 motility in mammalian fibroblasts. *J. Cell Biol.* (1999). doi:10.1083/jcb.145.4.837
- 717 43. Thayanithy, V. *et al.* A transwell assay that excludes exosomes for assessment of  
718 tunneling nanotube-mediated intercellular communication. *Cell Commun. Signal.* **15**,  
719 1–16 (2017).
- 720 44. Freeman, D. *et al.* Alpha-Synuclein Induces Lysosomal Rupture and Cathepsin  
721 Dependent Reactive Oxygen Species Following Endocytosis. *PLoS One* **8**, (2013).
- 722 45. Eriksson, I., Nath, S., Bornefall, P., Giraldo, A. M. V. & Öllinger, K. Impact of high  
723 cholesterol in a Parkinson's disease model: Prevention of lysosomal leakage versus  
724 stimulation of  $\alpha$ -synuclein aggregation. *Eur. J. Cell Biol.* **96**, 99–109 (2017).
- 725 46. Gowrishankar, S. *et al.* Massive accumulation of luminal protease-deficient axonal  
726 lysosomes at Alzheimer's disease amyloid plaques. *Proc. Natl. Acad. Sci.* **112**, E3699–  
727 E3708 (2015).
- 728 47. Annunziata, I. *et al.* Lysosomal NEU1 deficiency affects amyloid precursor protein  
729 levels and amyloid- $\beta$  secretion via deregulated lysosomal exocytosis. *Nat. Commun.* **4**,  
730 (2013).
- 731 48. Arispe, N., Pollard, H. B. & Rojas, E. Giant multilevel cation channels formed by  
732 Alzheimer disease amyloid beta-protein [A beta P-(1-40)] in bilayer membranes. *Proc.*  
733 *Natl. Acad. Sci. U. S. A.* **90**, 10573–7 (1993).
- 734 49. Kagan, B. L. Membrane pores in the pathogenesis of neurodegenerative disease. *Prog.*  
735 *Mol. Biol. Transl. Sci.* **107**, 295–325 (2012).
- 736 50. Julien, C. *et al.* In vivo induction of membrane damage by  $\beta$ -amyloid peptide  
737 oligomers. *Acta Neuropathol. Commun.* **6**, 131 (2018).
- 738 51. Thottacherry, J. J. *et al.* Mechanochemical feedback control of dynamin independent  
739 endocytosis modulates membrane tension in adherent cells. *Nat. Commun.* **9**, (2018).
- 740 52. Mandrekar, S. *et al.* Microglia mediate the clearance of soluble a $\beta$  through fluid phase  
741 macropinocytosis. *J. Neurosci.* (2009). doi:10.1523/JNEUROSCI.5572-08.2009
- 742 53. Daniels, R. H., Hall, P. S. & Bokoch, G. M. Membrane targeting of p21-activated  
743 kinase 1 (PAK1) induces neurite outgrowth from PC12 cells. *EMBO J.* (1998).  
744 doi:10.1093/emboj/17.3.754
- 745 54. Hanna, S. J. *et al.* The Role of Rho-GTPases and actin polymerization during  
746 Macrophage Tunneling Nanotube Biogenesis. *Sci. Rep.* (2017). doi:10.1038/s41598-  
747 017-08950-7
- 748 55. Delage, E. *et al.* Differential identity of Filopodia and Tunneling Nanotubes revealed  
749 by the opposite functions of actin regulatory complexes. *Sci. Rep.* (2016).  
750 doi:10.1038/srep39632

- 751 56. Bokoch, G. M. *et al.* A GTPase-independent Mechanism of p21-activated Kinase  
752 Activation. *J. Biol. Chem.* (1998). doi:10.1074/jbc.273.14.8137
- 753 57. Saavedra, L., Mohamed, A., Ma, V., Kar, S. & De Chaves, E. P. Internalization of  $\beta$ -  
754 amyloid peptide by primary neurons in the absence of apolipoprotein E. *J. Biol. Chem.*  
755 (2007). doi:10.1074/jbc.M701823200
- 756 58. Marshall, K. E., Vadukul, D. M., Staras, K. & Serpell, L. C. Misfolded amyloid- $\beta$ -42  
757 impairs the endosomal-lysosomal pathway. *Cell. Mol. Life Sci.* **77**, 5031–5043 (2020).
- 758 59. Grimm, M. O. W. *et al.* Regulation of cholesterol and sphingomyelin metabolism by  
759 amyloid- $\beta$  and presenilin. *Nat. Cell Biol.* (2005). doi:10.1038/ncb1313
- 760 60. Ma, Q. L. *et al.* p21-activated kinase-aberrant activation and translocation in  
761 Alzheimer disease pathogenesis. *J. Biol. Chem.* (2008). doi:10.1074/jbc.M708034200
- 762 61. Mukerji, J., Olivieri, K. C., Misra, V., Agopian, K. A. & Gabuzda, D. Proteomic  
763 analysis of HIV-1 Nef cellular binding partners reveals a role for exocyst complex  
764 proteins in mediating enhancement of intercellular nanotube formation. *Retrovirology*  
765 (2012). doi:10.1186/1742-4690-9-33
- 766 62. Van Den Broeke, C. *et al.* Alphaherpesvirus US3-mediated reorganization of the actin  
767 cytoskeleton is mediated by group A p21-activated kinases. *Proc. Natl. Acad. Sci. U.*  
768 *S. A.* (2009). doi:10.1073/pnas.0900436106
- 769 63. Jacob, T., Van den Broeke, C., Van Waesberghe, C., Van Troys, L. & Favoreel, H. W.  
770 Pseudorabies virus US3 triggers RhoA phosphorylation to reorganize the actin  
771 cytoskeleton. *J. Gen. Virol.* (2015). doi:10.1099/vir.0.000152
- 772 64. Andrews, N. W. & Corrotte, M. Plasma membrane repair. *Current Biology* (2018).  
773 doi:10.1016/j.cub.2017.12.034
- 774 65. Grant, B. D. & Donaldson, J. G. Pathways and mechanisms of endocytic recycling.  
775 *Nature Reviews Molecular Cell Biology* (2009). doi:10.1038/nrm2755
- 776 66. Bhat, S. *et al.* Rab11a–Rab8a cascade regulates the formation of tunneling nanotubes  
777 through vesicle recycling. *J. Cell Sci.* (2018). doi:10.1242/jcs.215889

778

779

780

781

782

783

784

785

786

787

788 **Figure Legends**

789

790 **Figure legend 1: oA $\beta$  induced formation of TNT-like conduits in differentiated SH-SY5Y**

791 **neuronal cells.** A-B) TNT-like conduits (indicated by white arrows) between neighbouring

792 cells were detected in differentiated SH-SY5Y cells incubated with 500, 250 and 200 nM of

793 oA $\beta$ -TMR (magenta) for 3 h, washed and stained with 50 nM of lysotracker (green) before the

794 capture of the image. The cells with long TNT-like conduits form noticeable blebs and cell

795 membrane expansion (indicated by yellow arrows), in contrast to control cells. A)

796 Differentiated control cells showed neurite like structures rather than TNT-like conduits. Note

797 that the control cells are also devoid of blebs and cell membrane expansion. C) Percentages of

798 cells with blebs / lamellipodia were quantified from the images taken with increasing

799 concentrations of oA $\beta$ -TMR (200-500 nM) and compared with the control cells. D) TNT-like

800 conduits were counted and plotted in percentage with respect to the number of cells from each

801 of the image frames. Quantifications were done from > 60 cells in each set. n > 3. Plots are

802 mean  $\pm$  SD. One-way ANOVA tests were performed to validate statistical significance. E)

803 Differentiated SH-SY5Y cells were incubated with 500 nM of oA $\beta$ -TMR (magenta) for 3 h,

804 washed and labelled with 50 nM of lysotracker (green) and a sequence of images at different

805 time points were taken. The cells form TNT-like conduits and oA $\beta$ -TMR travels from one cell-

806 to-another as organelle like puncta structures through the conduits (blue arrows). The cells form

807 noticeable blebs (yellow arrows). F) The cells treated with 250 nM oA $\beta$ -TMR (magenta) for 3

808 h form lamellipodia (yellow arrows), show direct transfer of oA $\beta$ -TMR from one cell-to-

809 another as organelle like puncta structures (blue arrows) through the TNT-like conduits (white

810 arrows). Scale bars are 10  $\mu$ m.

811

812 **Figure legend 2: oA $\beta$  induced formation of TNTs in partially differentiated SH-SY5Y**

813 **neuronal cells.** A-B) Partially differentiated SH-SY5Y cells were incubated with 250 nM of



814 oA $\beta$ -TMR (magenta) for 3 h, washed and labelled with 200 nM of lysotracker (green). A) oA $\beta$ -  
815 TMR internalized cell makes network between 3 neighbouring cells via formation of TNT-like  
816 connections (yellow arrows), extended from lamellipodia-like membrane protrusions (black  
817 arrows). B) TNT-like conduits form networks between two neighbouring cells (yellow arrow).  
818 C) Partially differentiated control cells devoid of blebs / lamellipodia. D) Partially  
819 differentiated SH-SY5Y cells were incubated with 250 nM of oA $\beta$ -TMR (magenta) for 3 h,  
820 washed and labelled with 200 nM of lysotracker (green). The cells form thin TNT-like conduits  
821 (yellow arrows) extended from expanded lamellipodia-like membrane protrusions (black  
822 arrows). oA $\beta$ -TMR co-localized with lysosomes that moves from one cell to another via  
823 connected conduits (yellow arrows). E-F) 3D volume views were composed from confocal z-  
824 stacks of phalloidin stained f-actin structures between neighbouring cells to validate whether  
825 the cell-to-cell conduits which were visible in bright field images are TNTs or not. G-H) Then,  
826 TNTs were distinguished from neurites from the characteristics of their capacity to stay  
827 hanging without touching the substratum even after fixing the cells. Quantifications of G)  
828 TNTs and H) neurites were done in the cells treated with 1  $\mu$ M of oA $\beta$  for 1-3 h, compared to  
829 the control cells, from > 60 cells in each set. Plots are mean  $\pm$  SD. One-way ANOVA tests  
830 were performed to validate statistical significance. Scale bars are 10  $\mu$ m.

831

832 **Figure Legend 3: oA $\beta$  induced PM damage and repair via coupled lysosomal-exocytosis**  
833 **and endocytosis.** A) TNT-like conduits (yellow arrows) were quantified in undifferentiated  
834 SHSY5Y cells co-transfected with lifeact-EGFP (actin) and CAAX-mCherry (peripheral  
835 membrane-protein). B) Quantification of TNT-like conduits from number of cells > 60 for each  
836 set. C) Massive membrane activities and endocytosis were observed in the oA $\beta$  (1  $\mu$ M) treated  
837 cells together with the membrane dye TMA-DPH (0.5  $\mu$ M), compared to control cells. D)  
838 Endocytosis of PM labelled with TMA-DPH was quantified by measuring luminal part

839 intensities (plotted mean  $\pm$  SD, quantified  $> 20$  cells from each set,  $n=3$ ). E) In  $\text{oA}\beta$  (1h with 1  
840  $\mu\text{M}$ ) treated cells, penetration of the membrane impermeable dye TMA-DPH on addition, and  
841 the cells show TNT-like conduits (yellow arrows). F) Cells incubated with extracellularly  
842 applied  $\text{oA}\beta$ -TMR (1  $\mu\text{M}$ ) internalize (magenta) efficiently to early-endosomes (Rab 5; green)  
843 and late-endosomes/lysosomes (Lamp1, green). G) Translocation of Lamp1-mGFP to cell  
844 surface (Upper panels),  $n=3$ . H) Lamp1 surface staining (Lower panel) within 15-30 min of  
845 exposure of  $\text{oA}\beta$  (1  $\mu\text{M}$ ) was quantified from intensity (plotted mean  $\pm$  SD) measurements from  
846 defined ROI using ImageJ. ( $n=3$ , each dot represents the number of cells). I-J)  $\text{oA}\beta$  (1  $\mu\text{M}$ )  
847 induced membrane damage detected as the uptake of the membrane-impermeable dye PI in  
848 presence and absence of  $\text{Ca}^{2+}$ , were quantified by flowcytometry. Represented histograms I) In  
849 presence and K-L) absence of  $\text{Ca}^{2+}$ . M) Representative dot-plot in absence of  $\text{Ca}^{2+}$ . N)  
850 Penetration of PI presented as a change of median fluorescence in control and  $\text{oA}\beta$  (1  $\mu\text{M}$ , 30  
851 min and 1 h) treated cells in presence and absence of  $\text{Ca}^{2+}$  ( $n = 6$ ). O) Representative confocal  
852 images of PI uptake after 2 h of  $\text{oA}\beta$  treatment compared to control. Plotted mean  $\pm$  SD. One-  
853 way ANOVA were performed to validate statistical significance. Scale bars are 10  $\mu\text{m}$ .

854

855 **Figure Legend 4. Mechanisms of rapid internalization of  $\text{oA}\beta$ -TMR were identified by**  
856 **pre-treating the SH-SY5Y cells with different endocytosis and receptor inhibitors.** The  
857 percentages of  $\text{oA}\beta$ -TMR containing cells in partially differentiated cells were analysed by  
858 flow cytometry. A) Cells were pretreated with the receptor inhibitors  $\alpha$ -Bungarotoxin, AP-5,  
859 GYKI.  $n=1$ , triplicates. B) Cells were pretreated with endocytosis inhibitors Dynasore, DPA,  
860 MDC, PAO,  $\text{NH}_4\text{Cl}$ , Baf, IPA-3 and EIPA, followed by exposure to 0.5  $\mu\text{m}$   $\text{oA}\beta$ -TMR for 1h.  
861  $n= 3$ ,  $>$  minimum of duplicates in each set. The percentage values were normalized to the  
862 respective mean of  $\text{oA}\beta$ . C) Representative dot-plots with forward scatter vs fluorescence  
863 intensities (TMR). D) Representative confocal images of undifferentiated SH-SY5Y cells



864 treated with endocytosis inhibitors and oA $\beta$ -TMR. E) Representative images are showing that  
865 internalized oA $\beta$ -TMR (magenta; 1  $\mu$ M incubated for 1 h) was not colocalized with 70 kDa  
866 Dextran-FITC (green) and GFP-GPI (green). One-way ANOVA tests were performed to  
867 validate statistical significance. Scale bar = 10  $\mu$ m.

868

869 **Figure Legend 5. Inhibition of rapid internalization of oA $\beta$  by the PAK 1 inhibitor IPA-**

870 **3 can also inhibit formation of TNTs.** A) Represented oA $\beta$  induced TNTs from confocal z-

871 stack images in the undifferentiated SH-SY5Y cells co-stained by phalloidin (magenta) and

872 anti PAK1/2-Thr423 (green). B) TNTs were quantified creating 3D volume view from z-stacks

873 confocal images. C) Quantification of TNTs in the cells treated with 1  $\mu$ M of oA $\beta$  for 1-3 h,

874 compared to the control cells. E) Fluorescence microscopy images of control cells, oA $\beta$  (1  $\mu$ M)

875 treated, IPA-3 treated and cells treated with IPA-3 and then oA $\beta$  were captured using

876 undifferentiated SH-SY5Y cells transfected with lifeact EGFP (green) (white arrows). D)

877 Number of TNTs were counted with respect to the number of cells to quantify the inhibition

878 by IPA-3 and compared the TNT numbers both in live cells and fixed cells. Number of cells >

879 50 for each set. Plotted mean  $\pm$  SD. One-way ANOVA tests were performed to validate

880 statistical significance. F) Superresolution images of lifeact stained undifferentiated SH-SY5Y

881 cells by DeltaVision™ OMX SR microscopy. SH-SY5Y cells were transfected with Plenti-

882 lifeact EGFP and treated with oA $\beta$  (1 $\mu$ M) and IPA-3 (20 $\mu$ M). F) In oA $\beta$  (1 h) treated cells,

883 TNTs appear to spread out as extensions from the long f-actin of the cytoskeleton and to

884 connect the two neighbouring cells. Fa) Zoomed image of a proper z-stack illustrated clearly

885 the f-actin labelled TNT. Fb) 3D volume view of z-stacks of SIM image shows that, in contrast

886 to neurons, TNTs do not touch the substratum, but rather stay “hanging” between the two

887 connected cells even after the fixation of the cells. G) In the IPA-3+oA $\beta$  treated cells,

888 disruptions of long stretched f-actin of cytoskeleton and inhibition of TNTs are evident. 3D  
889 reconstructions and analysis were done using ImageJ. Scale bars are 10  $\mu$ m.

890

891 **Figure Legend 6.  $\alpha$ A $\beta$  induced activated phospho-PAK1 modulates f-actin extensions and**  
892 **IPA-3 disrupts the long-stretched f-actin.** A) Confocal images of immuno-stained cells  
893 treated with  $\alpha$ A $\beta$  (1  $\mu$ M) over the time show localization of phospho-PAK1 (Thr423)/PAK2  
894 (Thr402) antibody (green) on TNTs (indicated by white arrows). B) Intensity analysis of z-  
895 projected confocal images show increase level of activated phospho-PAK1. C) Images of  
896 immuno-stained cells using phospho-PAK1 (Thr423)/PAK2 (Thr402) antibody (green) and  
897 actin-binding phalloidin-TMR (magenta) were taken by 20X 0.4 NA objective. D) Level of  
898 active phospho-PAK1 were quantified measuring the intensities from each cell using image-j  
899 ROI manager after background subtractions (number of cells >80 in each set) with  $\alpha$ A $\beta$ , IPA-  
900 3 and IPA-3+ $\alpha$ A $\beta$  treated cells. E) Number of TNT like cell-to-cell connections (indicated by  
901 white arrows) show a positive correlation with the intensities of activated phospho-PAK. F-G)  
902 Level of active phospho-PAK1 and phalloidin labelled actin were quantified by flowcytometry  
903 in the cells treated with  $\alpha$ A $\beta$ , IPA-3 and IPA-3+ $\alpha$ A $\beta$  in compared to the control. One-way  
904 ANOVA tests were performed to validate statistical significance. Scale bars = 10  $\mu$ m.

905

906 **Figure Legend 7:** Schematic summary to show that the sprouting of TNTs might be derived  
907 as a result of  $\alpha$ A $\beta$  induced PM damage and Ca<sup>2+</sup> dependent lysosomal-exocytosis engaged rapid  
908 membrane repair process, followed by PAK1-kinase dependent CIE and actin remodelling to  
909 re-establish the cell surface area expansion or membrane stress in equilibrium.

910

911

912

913 **Table 1**

914 Pre-treatment conditions for inhibitors.

| Inhibitor                                                                                        | Concentration | Treatment protocol                                                |
|--------------------------------------------------------------------------------------------------|---------------|-------------------------------------------------------------------|
| $\alpha$ -Bungaratoxin                                                                           | 100 nM        | kept during experiment                                            |
| AP-5 ((2R)-amino-5-phosphonopentanoate)                                                          | 100 $\mu$ M   | kept during experiment                                            |
| GYKI 52466 [4-(8-methyl-9H-1,3-dioxolo[4,5-h][2,3]benzodiazepin-5-yl)-benzenamine hydrochloride] | 100 $\mu$ M   | kept during experiment                                            |
| DPA (desipramine)                                                                                | 25 $\mu$ M    | 2 h before experiment                                             |
| Bafilomycin A1                                                                                   | 10 nM         | 30 min before experiment                                          |
| NH <sub>4</sub> Cl                                                                               | 10 mM         | 30 min before experiment, no washing step, kept during experiment |
| MDC (monodansylcadaverine)                                                                       | 50 $\mu$ M    | 30 min before experiment                                          |
| PAO (phenylarsine oxide)                                                                         | 300 $\mu$ M   | 30 min before experiment                                          |
| Dynasore                                                                                         | 80 $\mu$ M    | 30 min before experiment                                          |

|                                            |             |                          |
|--------------------------------------------|-------------|--------------------------|
| IPA-3 (1,1-Disulfanediyldinaphthalen-2-ol) | 20 $\mu$ M  | 30 min before experiment |
| EIPA (5-ethylisopropylamiloride)           | 100 $\mu$ M | 30 min before experiment |

---

915

916

## Table 1

917

918

919

920

921

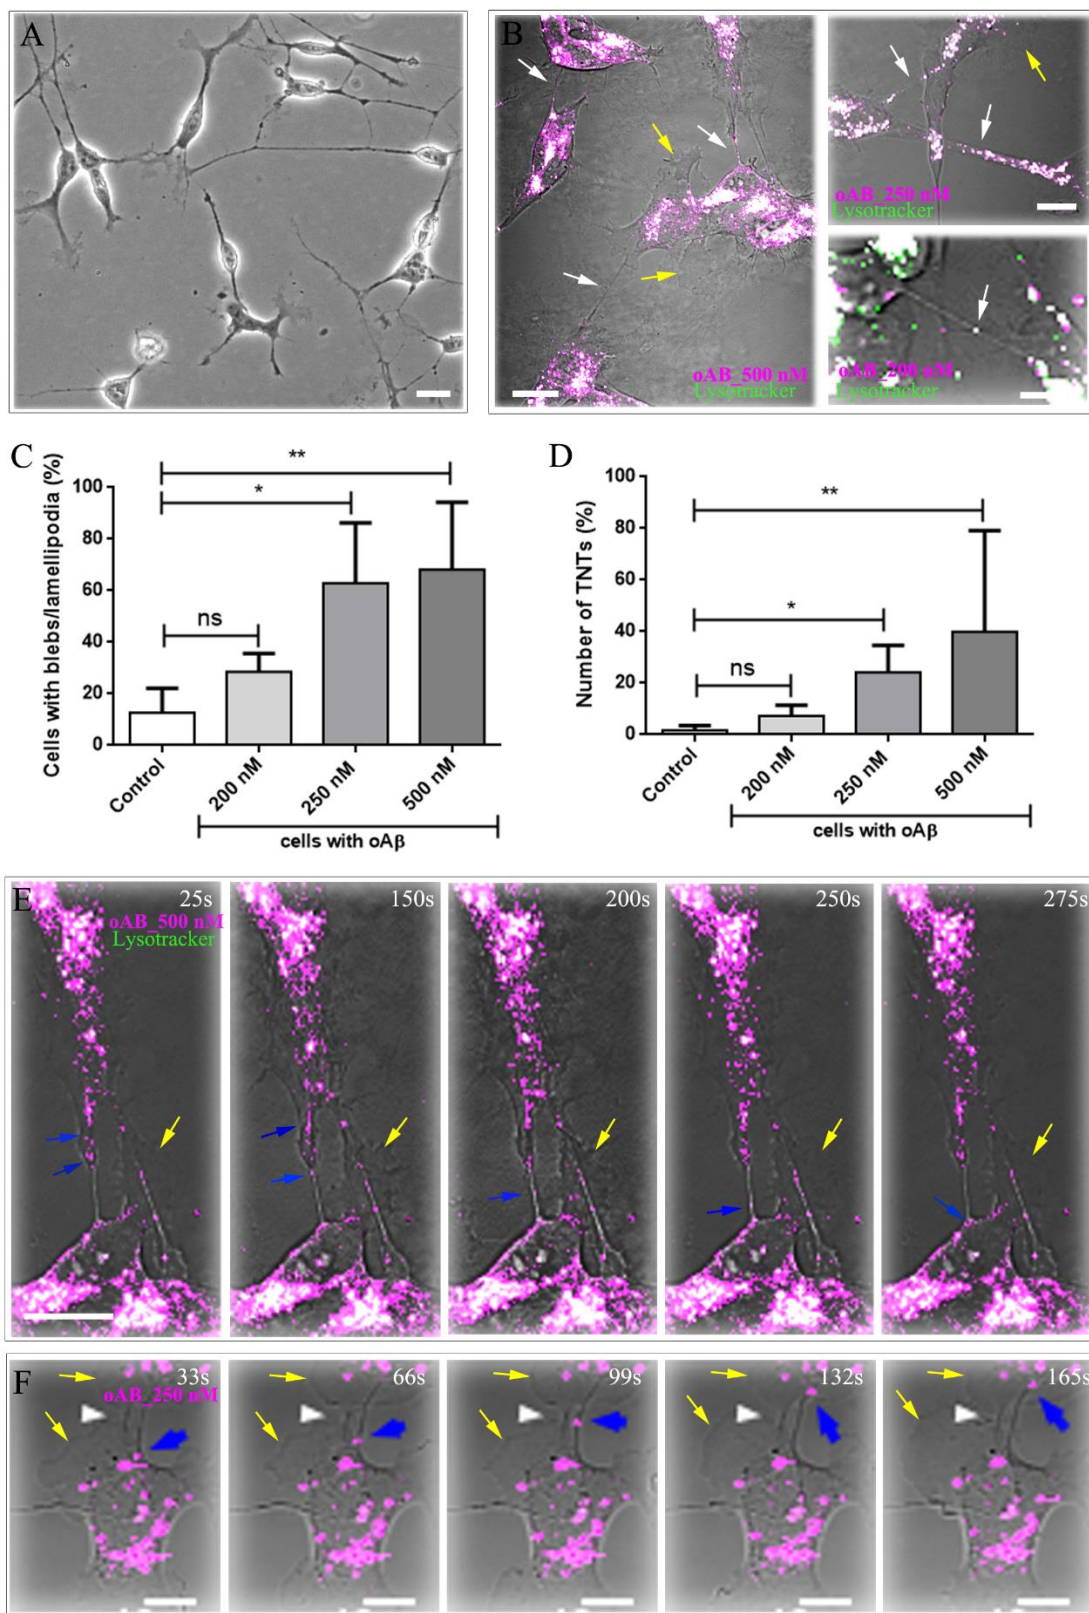

922

923

924

Figure 1

(Dilna et al. 2021)



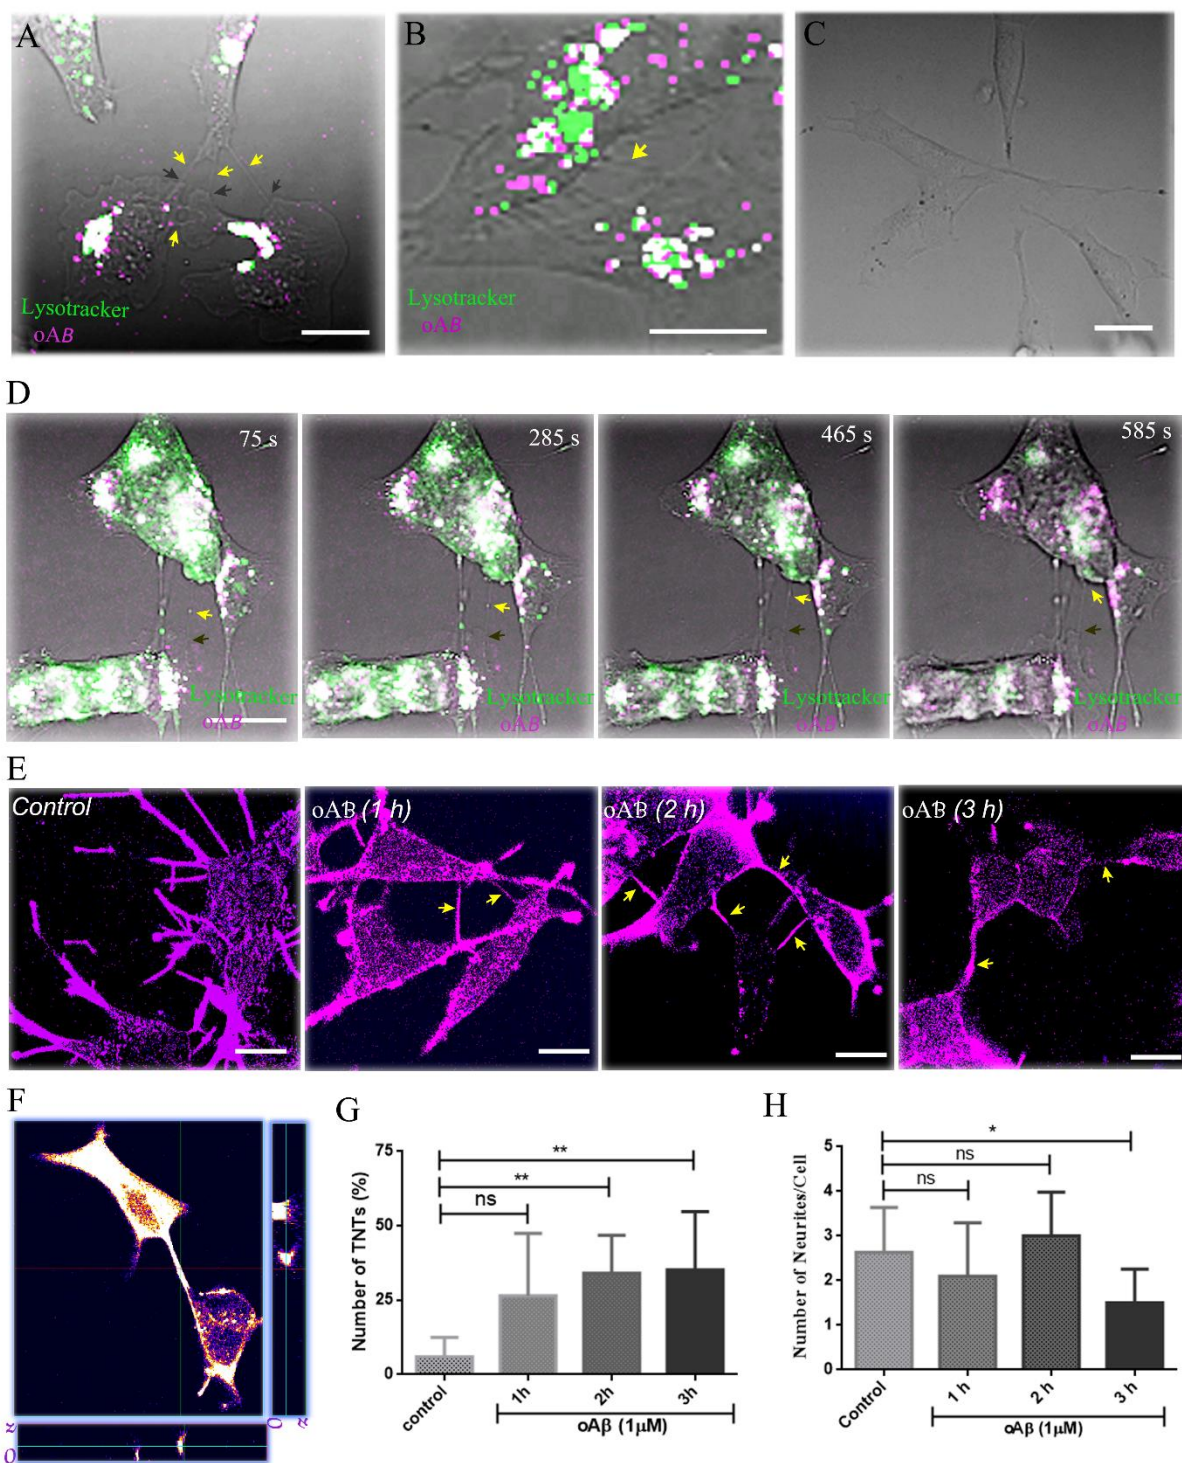

925

926

927

928

Figure 2

(Dilna *et al.* 2021)

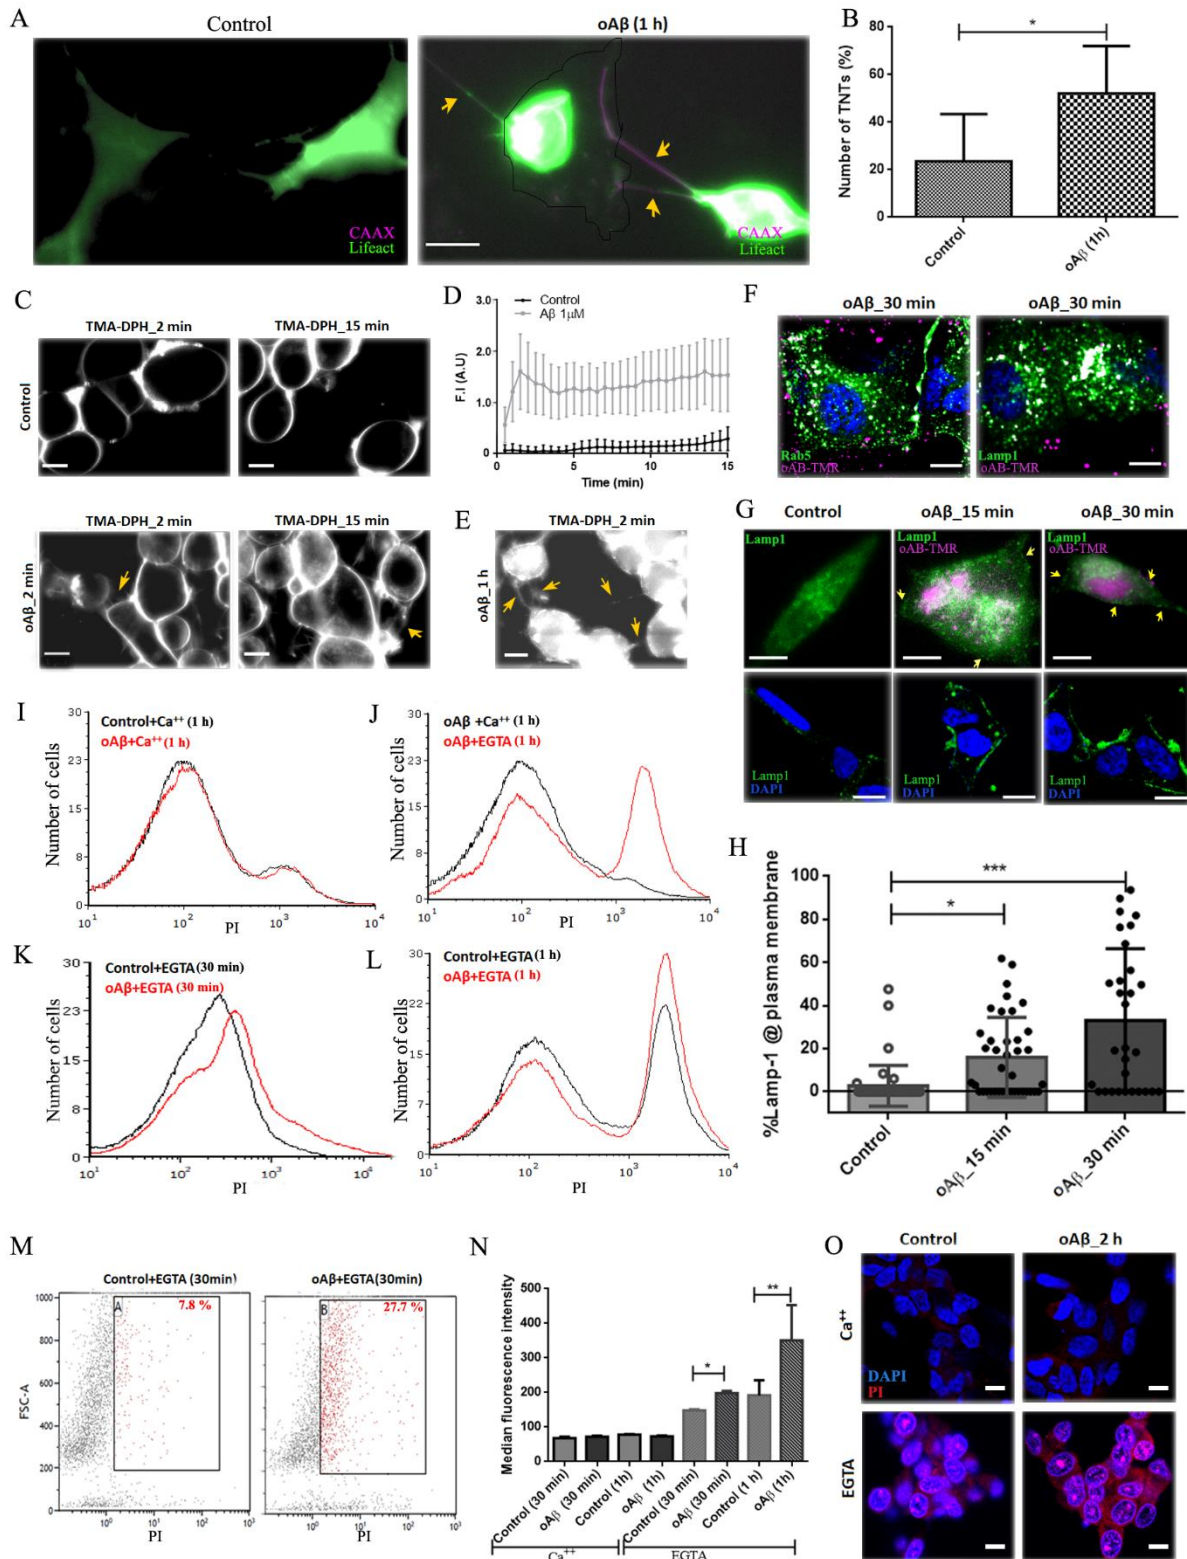

929

930

931

Figure 3

(Dilna et al. 2021)



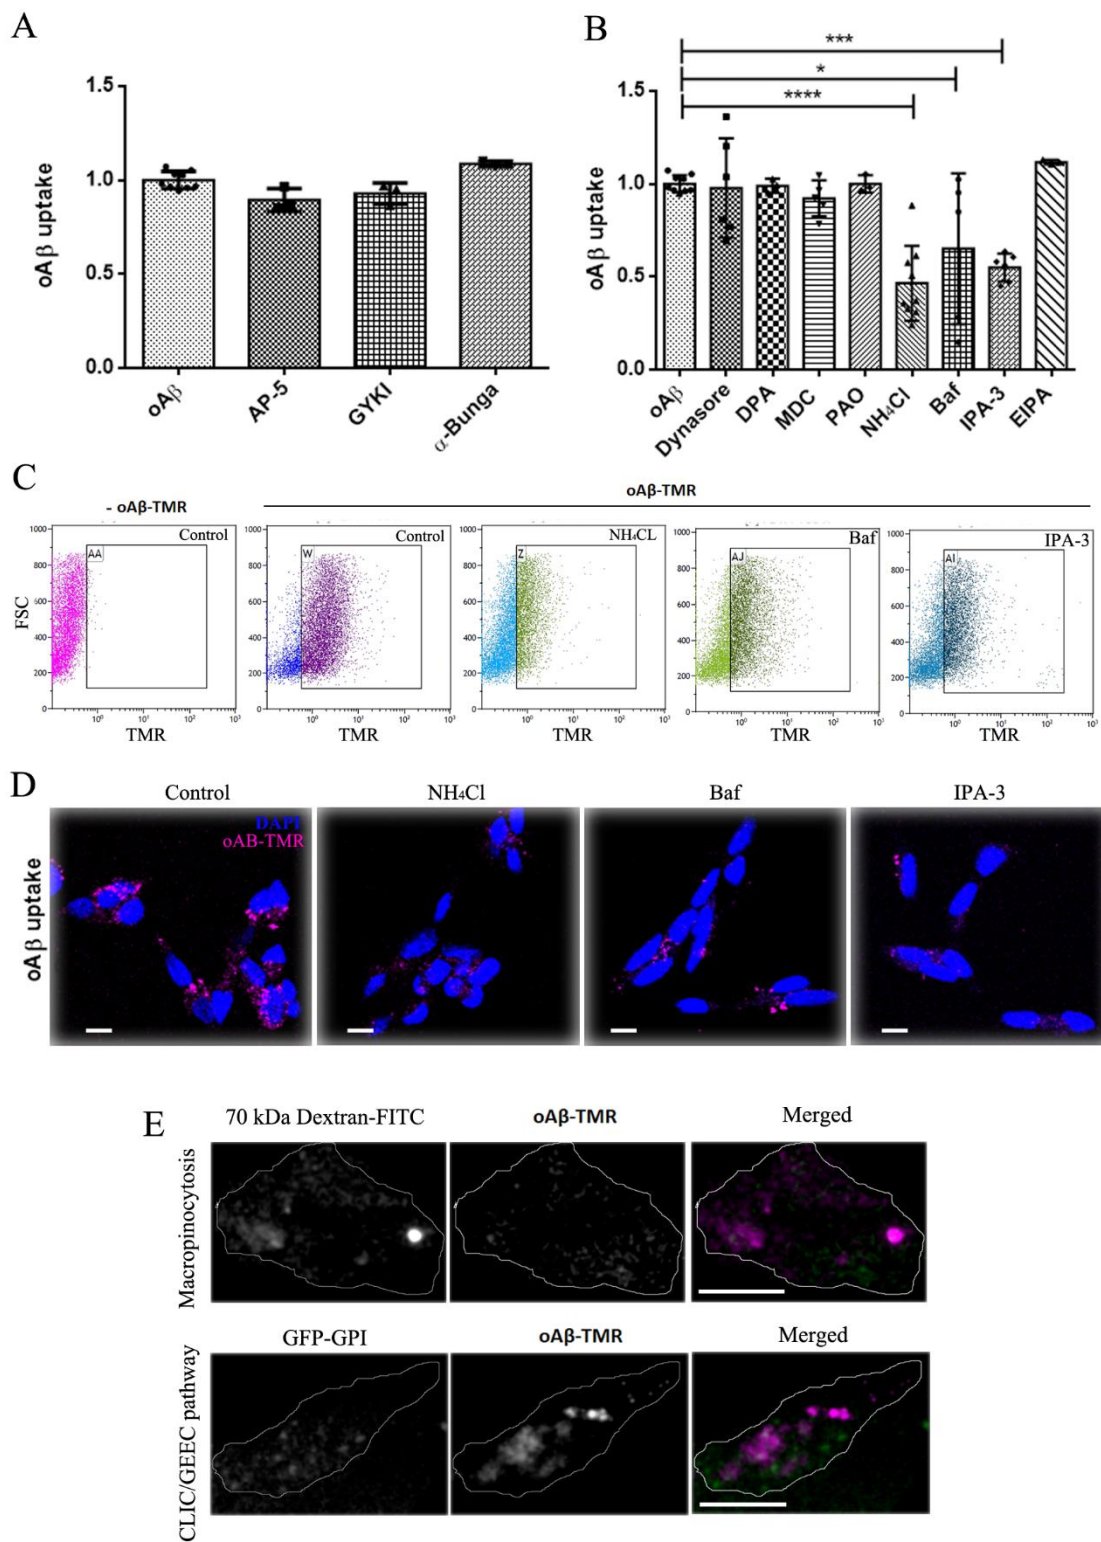

932

933

934

Figure 4

(*Dilna et al. 2021*)



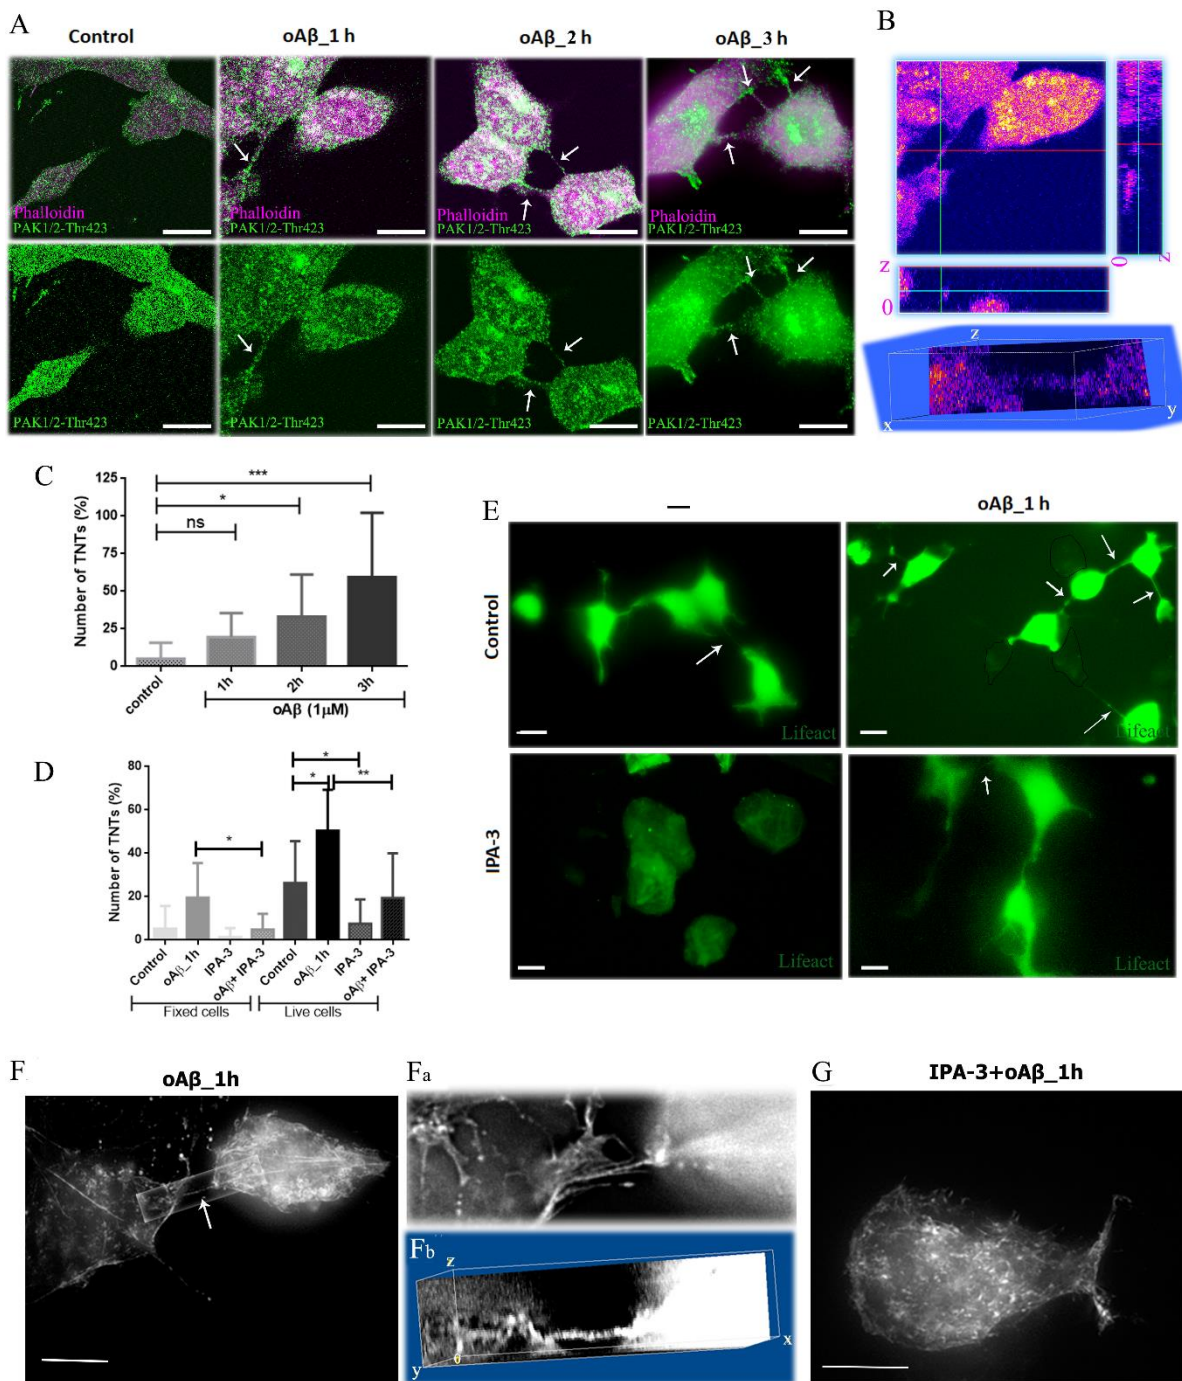

935

936

937

938

939

Figure 5

(Dilna et al. 2021)

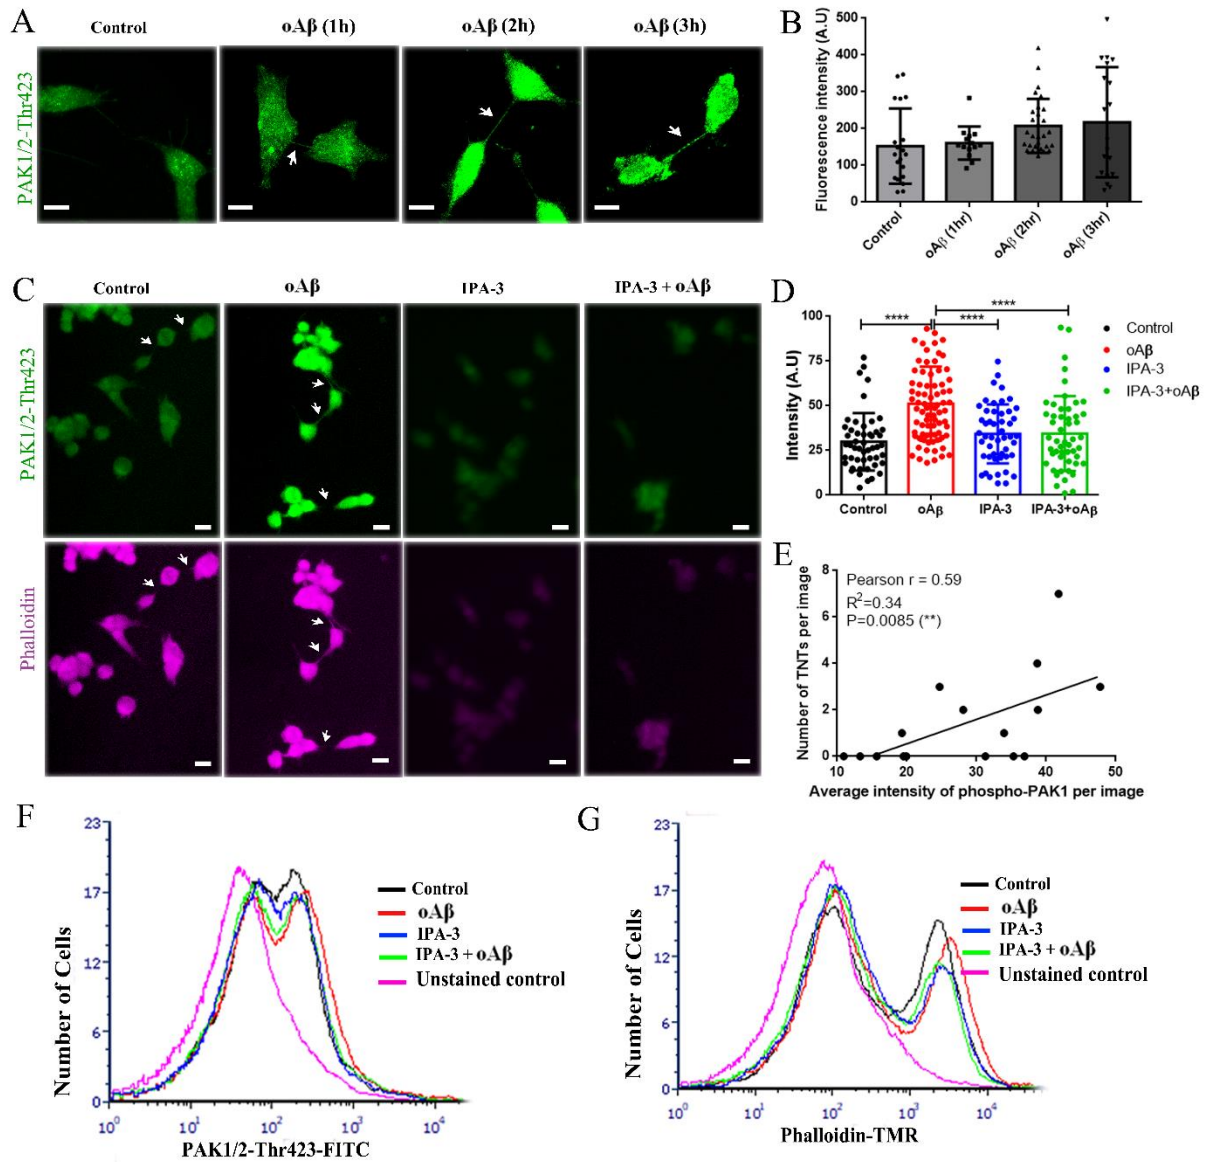

940

941

Figure 6

942

(Dilna et al. 2021)

943

944

945

946

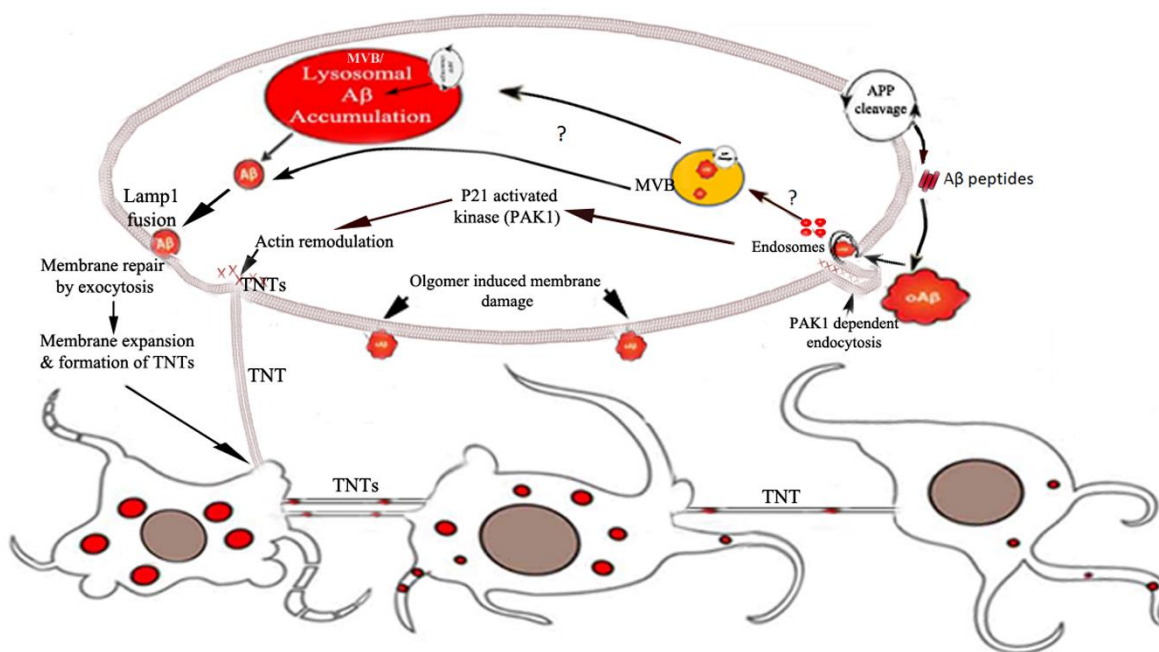

947

948

Figure 7

949

(Dilna et al. 2021)

950

951
